1  
2  
3  
4  
5  
6  
7  
8  
9  
10  
11  
12  
13  
14  
15  
16  
17  
18  
19  
20  
21  
22  
23  
24  
25  
26  
27  
28  
29  
30  
31  
32  
33  
34  
35

## Laminar-specific cortical dynamics in human visual and sensorimotor cortices

**James J Bonaiuto<sup>1</sup>, Sofie S Meyer<sup>1,2</sup>, Simon Little<sup>3</sup>, Holly Rossiter<sup>4</sup>, Martina F Callaghan<sup>1</sup>, Fred Dick<sup>5</sup>, Gareth R Barnes<sup>1\*</sup>, Sven Bestmann<sup>1,3\*</sup>**

\*: joint last author

1) Wellcome Centre for Human Neuroimaging, UCL Institute of Neurology, University College London, 12 Queen Square, London, UK

2) UCL Institute of Cognitive Neuroscience, University College London, 17 Queen Square, London, UK

3) Sobell Department of Motor Neuroscience and Movement Disorders, UCL Institute of Neurology, University College London, 33 Queen Square, London, UK

4) CUBRIC, School of Psychology, Cardiff University, Cardiff, UK

5) Birkbeck College, University of London, London, UK

**Corresponding author and Lead contact:** [j.bonaiuto@ucl.ac.uk](mailto:j.bonaiuto@ucl.ac.uk); [@jbonaiuto](https://twitter.com/jbonaiuto)

### **Abstract**

Lower frequency, feedback, activity in the alpha and beta range is thought to predominantly originate from infragranular cortical layers, whereas feedforward signals in the gamma range stem largely from supragranular layers. Distinct anatomical and spectral channels may therefore play specialized roles in communication within hierarchical cortical networks; however, empirical evidence for this organization in humans is limited. We leverage high precision MEG to test this proposal, directly and non-invasively, in human participants during visually guided actions. Visual alpha activity mapped onto deep cortical laminae, whereas visual gamma activity predominantly arose from superficial laminae. This laminar-specificity was echoed in sensorimotor beta and gamma activity. Visual gamma activity scaled with task demands in a way compatible with feedforward signaling. For sensorimotor activity, we observed a more complex relationship with feedback and feedforward processes. Distinct frequency channels thus operate in a laminar-specific manner, but with dissociable functional roles across sensory and motor cortices.

### **Keywords**

MEG, cortical laminae, action selection, feedback, feedforward

## 36 **Introduction**

37 The cerebral cortex is hierarchically organized via feedback and feedforward connections that  
38 originate predominantly from deep and superficial layers, respectively (Barone et al., 2000; Felleman  
39 and Van Essen, 1991; Markov et al., 2013, 2014a, 2014b). Evidence from non-human animal models  
40 suggests that information along those pathways is carried via distinct frequency channels: lower  
41 frequency (<30Hz) signals predominantly arise from deeper, infragranular layers, whereas higher  
42 frequency (>30Hz) signals stem largely from more superficial, supragranular layers (Bollimunta et al.,  
43 2008, 2011; Buffalo et al., 2011; Haegens et al., 2015; van Kerkoerle et al., 2014; Maier et al., 2010;  
44 Roopun et al., 2006, 2010; Smith et al., 2013; Sotero et al., 2015; Spaak et al., 2012; Sun and Dan,  
45 2009; Xing et al., 2012). These data have inspired general theories of cortical functional organization  
46 which ascribe specific computational roles to these pathways (Adams et al., 2013; Arnal and Giraud,  
47 2012; Bastos et al., 2012; Donner and Siegel, 2011; Fries, 2005, 2015; Friston and Kiebel, 2009;  
48 Jensen and Mazaheri, 2010; Jensen et al., 2015; Stephan et al., 2017; Wang, 2010). In these  
49 proposals, lower frequency activity subserves feedback, top-down communication, and originates in  
50 infragranular layers, whereas high-frequency activity is predominantly carried via projections from  
51 supragranular layers and conveys feedforward, bottom-up information.

52 However, evidence for these proposals in humans is largely indirect and focused on visual and  
53 auditory areas (Fontolan et al., 2014; Kok et al., 2016; Koopmans et al., 2010; Michalareas et al.,  
54 2016; Olman et al., 2012; Scheeringa and Fries, 2017). Whether it is indeed possible to attribute low  
55 and high frequency activity in humans to laminar-specific sources, throughout the cortical hierarchy,  
56 remains unclear. Here we leverage recent advances in high precision magnetoencephalography  
57 (MEG; Meyer et al., 2017a; Troebinger et al., 2014a) to address this issue directly and non-invasively  
58 across human visual and sensorimotor cortices.

59 MEG is a direct measure of neural activity (Baillet, 2017; Hämäläinen et al., 1993), with millisecond  
60 temporal precision that allows for delineation of brain activity across distinct frequency bands.  
61 Recently developed 3D printed headcast technology gives us more stability in head positioning as  
62 well as highly precise models of the underlying cortical anatomy. Together, this allows us to record  
63 higher signal-to-noise ratio (SNR) MEG data than previously achievable (Meyer et al., 2017a;  
64 Troebinger et al., 2014a). Theoretical and simulation work shows that these gains allow for  
65 distinguishing the MEG signal originating from either deep or superficial laminae (Troebinger et al.,  
66 2014b), in a time-resolved and spatially localized manner (Bonaiuto et al., 2017). We therefore  
67 employed this approach to directly test for the proposed laminar-specificity of distinct frequency  
68 channels in human cortex. Such a demonstration would provide important clarification for the  
69 proposed mechanism of inter-regional communication in hierarchical cortical networks.

70

## 71 **Results**

72

### 73 **Behavioral responses vary with perceptual evidence and cue congruence**

74 We investigated the laminar and spectral specificity of feedforward and feedback signals in visual  
75 and sensorimotor cortex with a visually guided action selection task. The task was designed to  
76 induce well-studied patterns of low- and high-frequency activity in visual (Busch et al., 2004; Fries et  
77 al., 2001; Hari and Salmelin, 1997; Hoogenboom et al., 2006; Mazaheri et al., 2014; Müller et al.,  
78 1996; Muthukumaraswamy and Singh, 2013; Sauseng et al., 2005; Thut, 2006; Yamagishi et al., 2005)  
79 and sensorimotor cortices (Cheyne et al., 2008; Crone et al., 1998; Donner et al., 2009; Gaetz et al.,  
80 2011; Haegens et al., 2011; Huo et al., 2010; de Lange et al., 2013; Pfurtscheller and Neuper, 1997;  
81 Pfurtscheller et al., 1996; Tan et al., 2016, 2014; Torrecillos et al., 2015) . Participants first viewed a  
82 random dot kinetogram (RDK) with coherent motion to the left or the right, which in most trials was  
83 congruent to the direction of the following instruction cue indicating the required motor response  
84 (an arrow pointing left equated to an instruction to press the left button, and vice versa; **Figure 1A**).

85 Participants could therefore accumulate the sensory evidence from the RDK during the 2s it was  
86 presented for in order to prepare their response in advance of the instruction cue. However, in  
87 incongruent trials the instruction cue was an arrow pointing in the opposite direction from the  
88 direction of coherent motion of the RDK, and so the opposite response from the expected one was  
89 required. The strength of the motion coherence was varied, modulating the strength of instructed  
90 response predictability, and thus we assume, feedforward and feedback activity (**Figure 1B**; Donner  
91 et al., 2009; de Lange et al., 2013).  
92

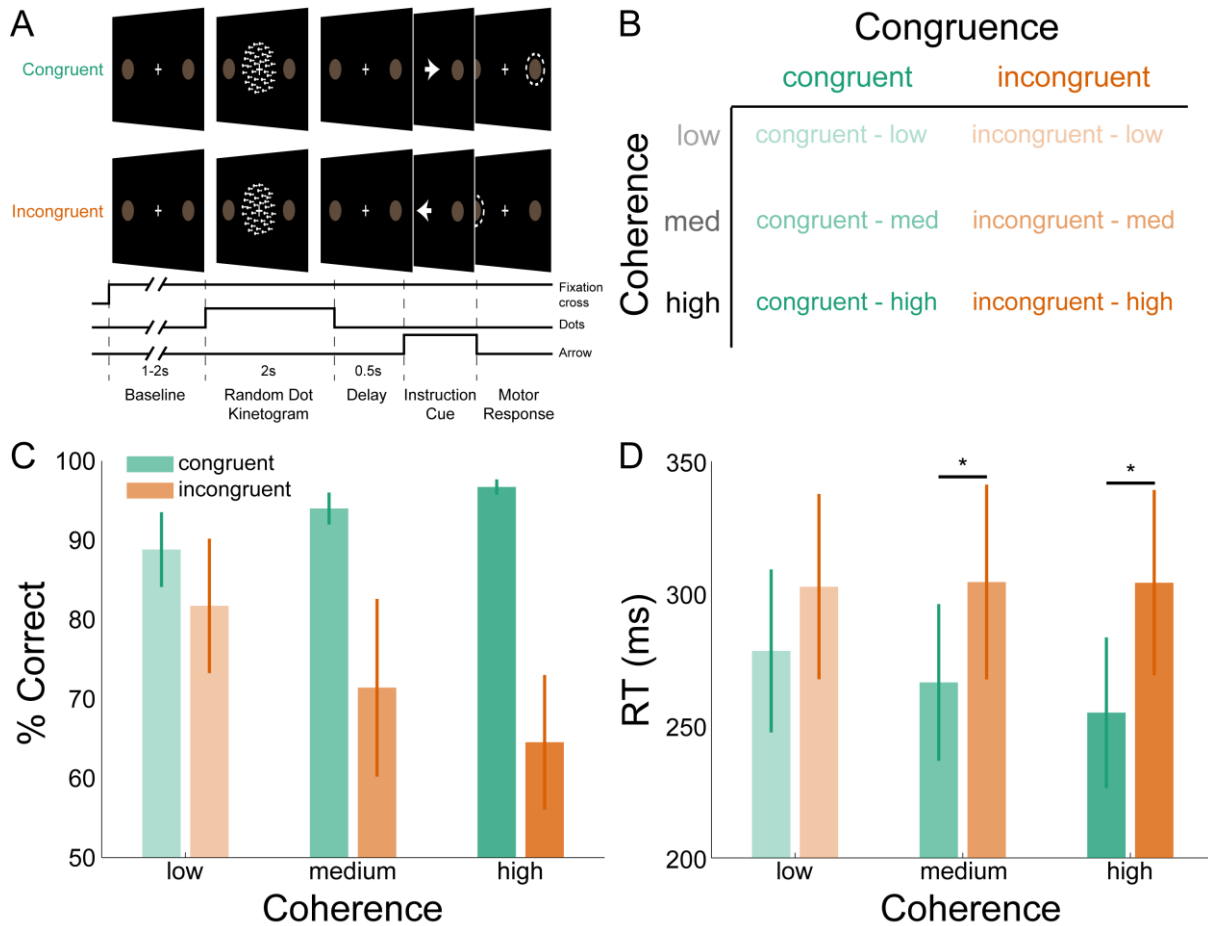

93  
94 **Figure 1. Task structure and participant behavior.** A) Each trial consisted of a fixation baseline (1-2s), random dot  
95 kinetogram (RDK; 2s), delay (0.5s), and instruction cue intervals, followed by a motor response (left/right button press) in  
96 response to the instruction cue (an arrow pointing in the direction of required button press). During congruent trials the  
97 coherent motion of the RDK was in the same direction that the arrow pointed in the instruction cue, while in incongruent  
98 trials the instruction cue pointed in the opposite direction. B) The task involved a factorial design, with three levels of  
99 motion coherence in the RDK and congruent or incongruent instruction cues. Most of the trials (70%) were congruent. C)  
100 Mean accuracy over participants during each condition. Error bars denote the standard error. Accuracy increased with  
101 increasing coherence in congruent trials, and worsened with increasing coherence in incongruent trials. D) The mean  
102 response time (RT) decreased with increasing coherence in congruent trials (\*  $p < 0.05$ ).  
103

104 As expected, participants responded more accurately and more quickly with increasing RDK motion  
105 coherence during congruent trials, while behavioral performance worsened with increasing  
106 coherence during incongruent trials (**Figure 1C, D**). This was demonstrated by a significant  
107 interaction between congruence and coherence for accuracy ( $F(2,35)=8.201, p=0.004$ ), and RT  
108 ( $F(2,35)=7.392, p=0.006$ ). Pairwise comparisons (Bonferroni corrected) showed that RTs were faster  
109 during congruent trials than incongruent trials at medium ( $t(7)=-3.235, p=0.0429$ ) and high  
110 coherence levels ( $t(7)=-3.365, p=0.036$ ). Participants were thus faster and more accurate when the  
111 cued action matched the action they had prepared (congruent trials), and slower and less accurate  
112 when these actions were incongruent.

113

114 **High SNR MEG recordings using individualized headcasts**

115 Subject-specific headcasts minimize both within-session movement and co-registration error (Meyer  
116 et al., 2017a; Troebinger et al., 2014a). This ensures that when MEG data are recorded over separate  
117 days, the brain remains in the same location with respect to the MEG sensors. In all participants,  
118 within-session movement was <0.2mm in the x and y dimensions and <1.5mm in the z dimension,  
119 while co-registration error was <1.5mm in any dimension (estimated by calculating the within-  
120 participant standard deviation of the absolute coil locations across recording blocks; **Figure S1**). To  
121 assess the between-session homogeneity of our data, we examined topographic maps, event-related  
122 fields (ERFs), and time-frequency decompositions. In each, the data were analyzed in three ways:  
123 aligned to the onset of the RDK (**Figure 2A**), instruction cue (**Figure 2B**), or button response (**Figure**  
124 **2C**). The data were acquired during four separate recording sessions, spaced at least a week apart.  
125 This analysis revealed that topographic maps and event-related fields from individual MEG sensors  
126 and time-frequency spectra from sensor clusters are highly reproducible across different days of  
127 recording within an individual participant. Because the headcast approach ensured that participants  
128 were in an identical position on repeated days of recording, we were able to obtain very high signal-  
129 to-noise (SNR) datasets.

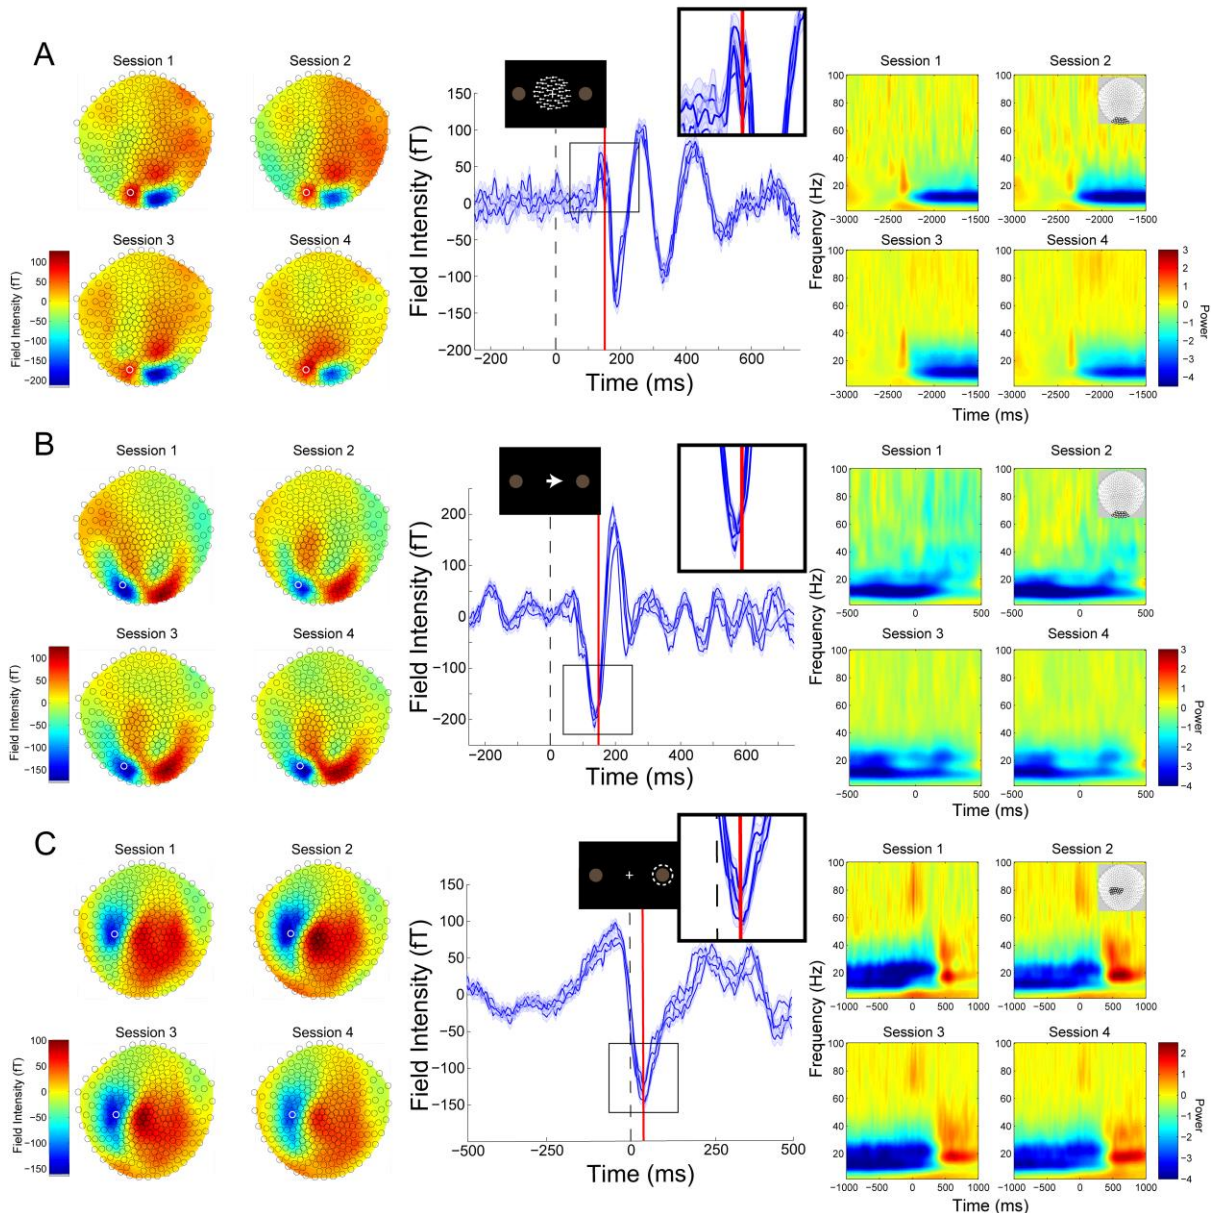

130  
 131 **Figure 2: Cross-session reproducibility.** Topographic maps (left column), event-related fields (ERFs, middle column), and  
 132 time-frequency decompositions (right column) aligned to: A) onset of the random dot kinetogram (RDK), B) onset of the  
 133 instruction cue, or C) the participant's response (button press). Data shown are for a single representative participant for  
 134 four sessions on different days (each including three, 15 minute blocks, 180 trials per block). The white circles on the  
 135 topographic maps denote the sensor from which the ERFs in the middle are recorded. Each blue line in the ERF plots  
 136 represents a single session (average of 540 trials), with shading representing the standard error (within-session variability)  
 137 and the red lines showing the time point that the topographic maps are plotted for (150ms for the RDK and instruction cue,  
 138 35ms for the response). The insets show a magnified view of the data plotted within the black square. The time-frequency  
 139 decompositions are baseline corrected (RDK-aligned: [-500, 0ms]; instruction cue-aligned: [-3s, -2.5s]; response-aligned: [-  
 140 500ms, 0ms relative to the RDK]) and averaged over the sensors shown in the insets.

141

142

### 143 Low and high frequency activity localize to different cortical laminae

144 To address our main question about the laminar specificity of different frequency channels in human  
 145 cortex, we extracted task-related low- and high-frequency activity from visual and sensorimotor  
 146 cortices. Attention to visual stimuli is associated with decreases in alpha (Hari and Salmelin, 1997;  
 147 Mazaheri et al., 2014; Sauseng et al., 2005; Thut, 2006; Yamagishi et al., 2005) and increases in  
 148 gamma activity in visual cortex (Busch et al., 2004; Fries et al., 2001; Hoogenboom et al., 2006;

149 Müller et al., 1996; Muthukumaraswamy and Singh, 2013). We therefore examined the decrease in  
150 alpha (7-13Hz) power following the onset of the RDK, as well as the increase in gamma (60-90Hz)  
151 activity following the onset of the RDK and the instruction cue.

152 Motor responses are associated with a stereotypical pattern of spectral activity in contralateral  
153 sensorimotor cortex involving a decrease in beta power during response preparation, followed by a  
154 rebound in beta activity. Moreover, a burst of gamma activity typically occurs in contralateral  
155 sensorimotor cortex aligned to the movement (Cheyne et al., 2008; Crone et al., 1998; Gaetz et al.,  
156 2011; Huo et al., 2010; Pfurtscheller and Neuper, 1997; Pfurtscheller et al., 1996). These two signals  
157 are relevant for testing the proposed feedback and feedforward role of low and high frequency  
158 activity, respectively, for the following reasons. First, the beta power decrease prior to movement is  
159 thought to reflect the removal of inhibition that prevents movement (Engel and Fries, 2010).  
160 Moreover, gamma bursts at movement onset arise from motor cortex, are effector-specific, and are  
161 thought to reflect the feedback control of discrete movements (Cheyne et al., 2008;  
162 Muthukumaraswamy, 2010), and prediction error processing for the purpose of updating motor  
163 predictions (Mehrkanoon et al., 2014). The akinetic role of pre-movement beta and the proposed  
164 role of movement-related gamma would be difficult to reconcile with the proposed role of these  
165 frequency channels in feedback and feedforward control in sensory cortices. This suggests that in  
166 sensorimotor cortex, these activity channels may not be organized in the same laminar-specific  
167 manner. Alternatively, the same laminar-specific organization may have functional roles that are  
168 distinct from the proposed feedback and feedforward communication in sensory cortex. We  
169 therefore analyzed the decrease in sensorimotor beta (15-30Hz) power during the RDK and its  
170 subsequent rebound following the participant's response, as well as the response-aligned gamma  
171 (60-90Hz) burst.

172 Localization of activity measured by MEG sensors requires accurate generative forward models  
173 which map from cortical source activity to measured sensor data (Baillet, 2017; Hillebrand and  
174 Barnes, 2002, 2003; Larson et al., 2014). We constructed a generative model for each participant  
175 based on a surface mesh including both their white matter and pial surfaces, representing both deep  
176 and superficial cortical laminae, respectively (**Figure 3**, left column). We were thus able to compare  
177 the estimated source activity for measured visual and sensorimotor activity on the white matter and  
178 pial surface, and infer its laminar origin as deep if the activity is strongest on the white matter  
179 surface or superficial if it is strongest on the pial surface. For the purposes of comparison with  
180 invasive neural recordings, deep laminae correspond to infragranular cortical layers, and superficial  
181 laminae correspond to supragranular layers.

182 The veracity of laminar inferences using this analysis is highly dependent on the accuracy of the  
183 white matter and pial surface segmentations. Imprecise surface reconstructions from standard 1mm  
184 isotropic T1-weighted volumes result in coarse-grained meshes, which do not accurately capture the  
185 separation between the two surfaces, and thus do not allow distinctions to be made between deep  
186 and superficial laminae (**Figure S2**). We therefore extracted each surface from high-resolution  
187 (800 $\mu$ m isotropic) MRI multi-parameter maps (Carey et al., 2017), allowing fine-grained  
188 segmentation of the white matter and pial surfaces.

189 For each low- and high-frequency visual and sensorimotor signal, the laminar analysis first calculated  
190 the absolute change in power from a baseline time window on the vertices of each surface, and then  
191 compared the power change between surfaces using paired t-tests. The resulting t-statistic was  
192 positive when the change in power was greater on the pial surface (superficial), and negative when  
193 the change was greater on the white matter surface (deep; **Figure 3**). To get a global measure of  
194 laminar specificity, we averaged the change in power over the whole brain (all vertices) within each  
195 surface. In order to make spatially localized laminar inferences, we then identified regions of interest  
196 (ROIs) in each subject based on the mean frequency-specific change in power from a baseline time

197 window on vertices from either surface (Bonaiuto et al., 2017; **Figure 3**). We further compared two  
198 metrics for defining the ROIs: functionally defined (centered on the vertex with the peak mean  
199 difference in power), and anatomically-constrained (centered on the vertex with the peak mean  
200 power difference within the visual cortex bilaterally, or in the contralateral motor cortex).  
201

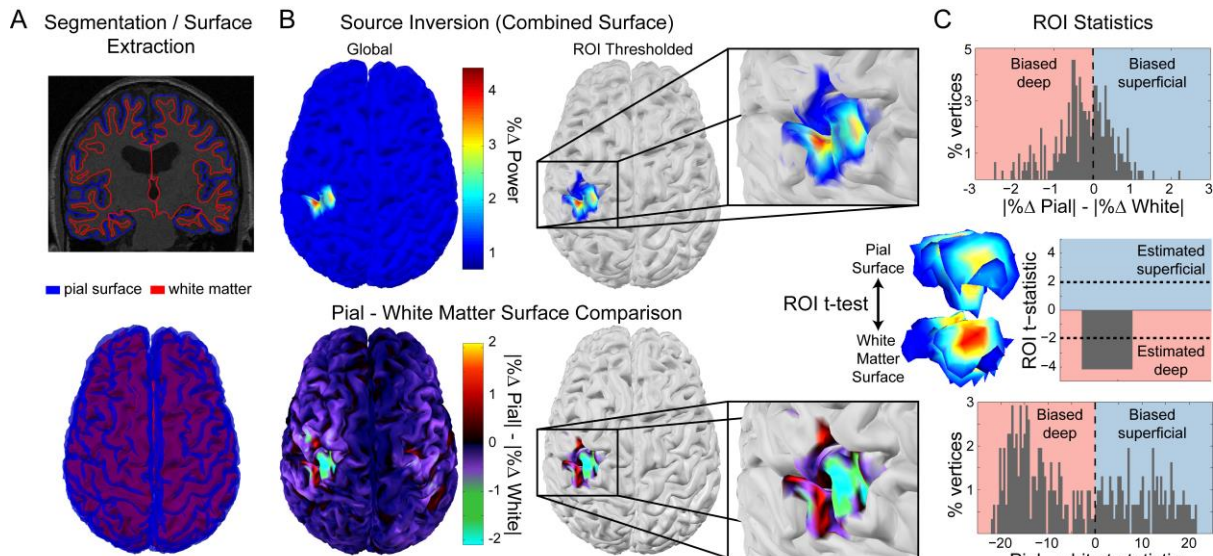

202 **Figure 3: Laminar analysis.** Pial and white matter surfaces are extracted from quantitative maps of proton density and T1  
203 times obtained from a multi-parameter mapping MRI protocol (A, top). The model constitutes a generative model  
204 combining both surfaces (A, bottom) which is used to perform source inversion using the measured sensor data, resulting in  
205 an estimate of the activity at every vertex on each surface (B, top left). The ROI analysis defined a region of interest by  
206 comparing the change in power in a particular frequency band during a time window of interest from a baseline time period  
207 (B, top right). The ROI includes all vertices in either surface in the 80th percentile as well as corresponding vertices in the  
208 other surface. The absolute change in power on each surface was then compared within the ROI (B, bottom; C, top).  
209 Pairwise t-tests were performed between corresponding vertices on each surface within the ROI to examine the distribution  
210 of t-statistics (C, bottom), as well as on the mean absolute change in power within the ROI on each surface to obtain a  
211 single t-statistic which was negative if the greatest change in power occurred on the white matter surface, and positive if it  
212 occurred on the pial surface (C, middle).  
213

### 214 **Visual alpha and gamma have distinct laminar specific profiles**

215 Based on *in vivo* laminar recordings in non-human primates (Bollimunta et al., 2008, 2011; Buffalo et  
216 al., 2011; Haegens et al., 2015; van Kerkoerle et al., 2014; Maier et al., 2010; Spaak et al., 2012; Sun  
217 and Dan, 2009; Xing et al., 2012), we reasoned that changes in alpha activity following the RDK  
218 should predominate in infragranular cortical layers. By contrast, changes in gamma activity following  
219 the RDK and instruction cue should be strongest in supragranular layers. Source reconstructions of  
220 the change in visual alpha activity following the onset of the RDK on the white matter and pial  
221 surfaces approximating the proposed laminar origins are shown for an example participant over the  
222 whole brain and within the functionally defined ROI in **Figure 4A**. Activity on both surfaces localized  
223 to visual cortex bilaterally. When performing paired t-tests comparing corresponding vertices on the  
224 pial and white matter surfaces over all trials, the distribution of alpha activity was skewed toward  
225 the white matter surface, in line with an infragranular origin. This bias was also observed within the  
226 functionally defined ROI. When averaging the change in power either over the whole brain, within a  
227 functionally-defined, or an anatomically constrained ROI, the visual alpha activity of most  
228 participants was classified as originating from the white matter surface (global: 8/8 participants,  
229 functional ROI: 7/8 participants, anatomical ROI: 5/8 participants; **Figure 4A**, right).  
230

231 Conversely, the increase in visual gamma following the onset of the RDK and instruction cue was  
232 strongest on the pial surface (**Figure 4B**, C) as expected. Example source reconstructions on the pial  
233 and the white matter surface show activity in the same bilateral areas over visual cortex as visual  
234 alpha (**Figure 4B**, C). For visual gamma, the distributions of t-statistics for pairwise vertex

235 comparisons were skewed toward the pial surface, a finding that is compatible with a supragranular  
236 origin of high-frequency gamma activity. This was confirmed in subsequent global, functional, and  
237 anatomical ROI metrics (RDK gamma, global: 7/8 participants; RDK gamma, functional ROI: 7/8  
238 participants; RDK gamma, anatomical ROI: 7/8 participants; instruction cue gamma, global: 7/8  
239 participants; instruction cue gamma, functional ROI: 7/8 participants; instruction cue gamma,  
240 anatomical ROI: 5/8 participants).

241 We then conducted three control analyses to ascertain the robustness of our findings: shuffling of  
242 the position of the sensors, simulation of increased co-registration error, and decreasing effective  
243 SNR by using only a random subset of the trials for each participant (see Supplemental Information).  
244 Shuffling the position of the sensors destroys any correspondence between the anatomy and the  
245 sensor data. Added co-registration error simulates the effect of between-session spatial uncertainty  
246 arising from head movement and inaccuracies of the forward model typically experienced without  
247 headcasts (Hillebrand and Barnes, 2003, 2011; Medvedovsky et al., 2007; Meyer et al., 2017b;  
248 Troebinger et al., 2014b; Uutela et al., 2001). For both control analyses, visual alpha and gamma  
249 activity now localized to the pial surface (**Figure S3, S4**), suggesting that the laminar discrimination  
250 between visual alpha and gamma in our main analyses would not have been possible were it not for  
251 the high-SNR data coupled with the high-precision anatomical models.

252 The magnitude of the ROI t-statistics for all participants increased with the number of trials used in  
253 the analysis, with more trials required for visual gamma signals to reach significance (**Figure S5**).  
254 Therefore, the laminar bias exhibited by visual alpha and gamma was unlikely to be driven by a small  
255 subset of the trials. One concern was that the effects could be driven by signal power (i.e. higher  
256 power signals always localize deeper). Importantly however, regardless of the SNR the shuffled  
257 sensor models did not show this behavior within the functionally defined and anatomically  
258 constrained ROIs (**Figure S5**).  
259



9

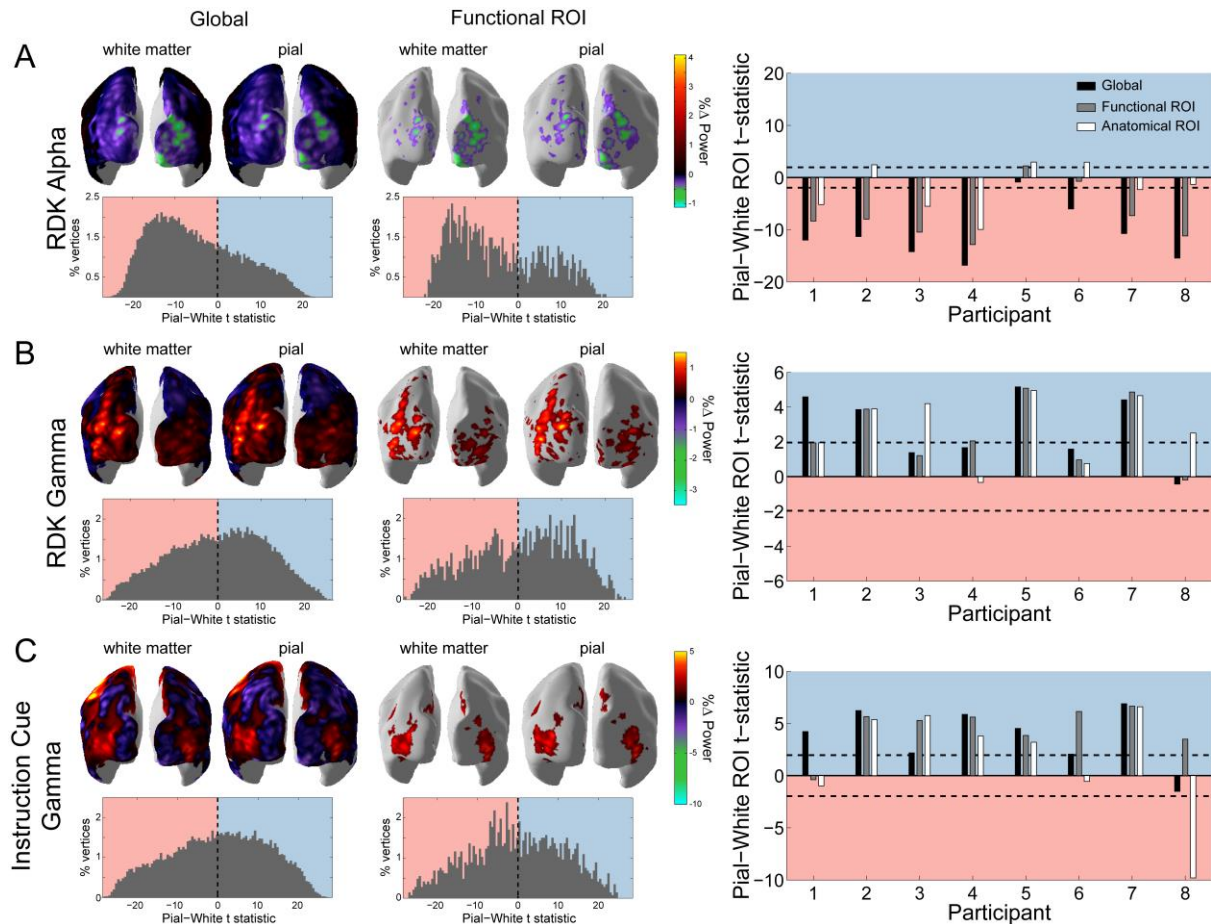

260  
261  
262  
263  
264  
265  
266  
267  
268  
269  
270  
271

**Figure 4: Laminar specificity of visual alpha and gamma.** A) Estimated changes in alpha power (7-13Hz) from baseline on the white matter and pial surface following the onset of the random dot kinetogram (RDK), over the whole brain (global) and within a functionally defined region of interest (ROI). Histograms show the distribution of t-statistics comparing the absolute change in power between corresponding pial and white matter surface vertices over the whole brain, or within the ROI. Negative t-statistics indicate a bias toward the white matter surface, and positive t-statistics indicate a pial bias. The bar plots show the t-statistics comparing the absolute change in power between the pial and white matter surfaces averaged within the ROIs, over all participants. T-statistics for the whole brain (black bars), functionally defined (grey bars), and anatomically constrained (white bars) ROIs are shown (red = biased toward the white matter surface, blue = biased pial). Dashed lines indicate the threshold for single subject statistical significance. B) As in A, for gamma (60-90Hz) power following the RDK. C) As in A and B, for gamma (60-90Hz) power following the instruction cue.

272 ***Sensorimotor beta and gamma originate from distinct cortical laminae***

273 The above results provide novel support for distinct anatomical pathways through which different  
274 frequency channels contribute to intra-areal communication within visual cortex. We next addressed  
275 whether this laminar specificity of different frequency channels was common to other portions of  
276 cortex, specifically sensorimotor cortex.

277 Cortical regions vary in terms of thickness (Fischl and Dale, 2000; Jones et al., 2000; Kabani et al.,  
278 2001; Lerch and Evans, 2005; MacDonald et al., 2000), as a result of inter-regional variation in  
279 cortical folding and laminar morphology (Barbas and Pandya, 1989; Hilgetag and Barbas, 2006;  
280 Matelli et al., 1991; Rajkowska and Goldman-Rakic, 1995). Moreover, the distinction between  
281 feedback and feedforward cortical processing channels may be less clear for motor cortex, which is  
282 agranular (missing layer IV) and projects directly to the spinal cord. Supporting this argument, motor  
283 gamma bursts are closely tied to movement onset, and thought to reflect the execution, or feedback  
284 control, of movement (Cheyne and Ferrari, 2013; Cheyne et al., 2008).

285 While frequency-specific activity thus occurs throughout cortex, the laminar distribution of different  
286 frequency channels may differ across different levels in the cortical hierarchy. Because MEG is only  
287 sensitive to the synchronous activity of large populations of pyramidal cells, it is likely that different  
288 laminar microcircuits could give rise to the same measurable MEG signals (Cohen, 2017).  
289 Alternatively, if the layer specificity of low and high frequency activity is a general organizing  
290 principle of cortex, one would expect the pre-movement beta decrease and post-movement  
291 rebound to originate from infragranular cortical layers, and the movement-related gamma increase  
292 to be strongest in supragranular layers. Moreover, the ability of MEG to accurately segregate deep  
293 from superficial laminar source activity may vary throughout cortex, a possibility we have previously  
294 explored in simulation (Bonaiuto et al., 2017).

295 To explore this possibility empirically, we analyzed two task-related modulations of sensorimotor  
296 beta activity: the decrease in beta power following the onset of the RDK, just prior to the motor  
297 response, and the post-movement beta rebound (Cassim et al., 2001; Jurkiewicz et al., 2006; Parkes  
298 et al., 2006; Pfurtscheller et al., 1996; Salmelin et al., 1995). Both signals localized to the left  
299 sensorimotor cortex (contralateral to the hand used to indicate the response; **Figure 5A, B**), and  
300 both signals were strongest on the white matter surface, as evidenced by the white matter skews in  
301 the global and functional ROI t-statistics (**Figure 5**). This laminar pattern with both the beta decrease  
302 and rebound classified as originating from the white matter surface held for all but one participant.  
303 This general finding is of relevance as it addresses concerns that the high SNR of beta activity trivially  
304 leads to its attribution to the deeper cortical surface. Here, the two epochs of beta activity were  
305 characterized by power decreases and increases, respectively, meaning that SNR alone cannot  
306 explain the laminar localization of beta activity.

307 The burst of gamma aligned with the onset of the movement localized to the same patch of left  
308 sensorimotor cortex (**Figure 5C**), and in the example participant shown in **Figure 5** and for most  
309 participants, was strongest on the pial surface (global: 7/8 participants; function ROI: 6/8  
310 participants; anatomical ROI: 6/8 participants).

311

11

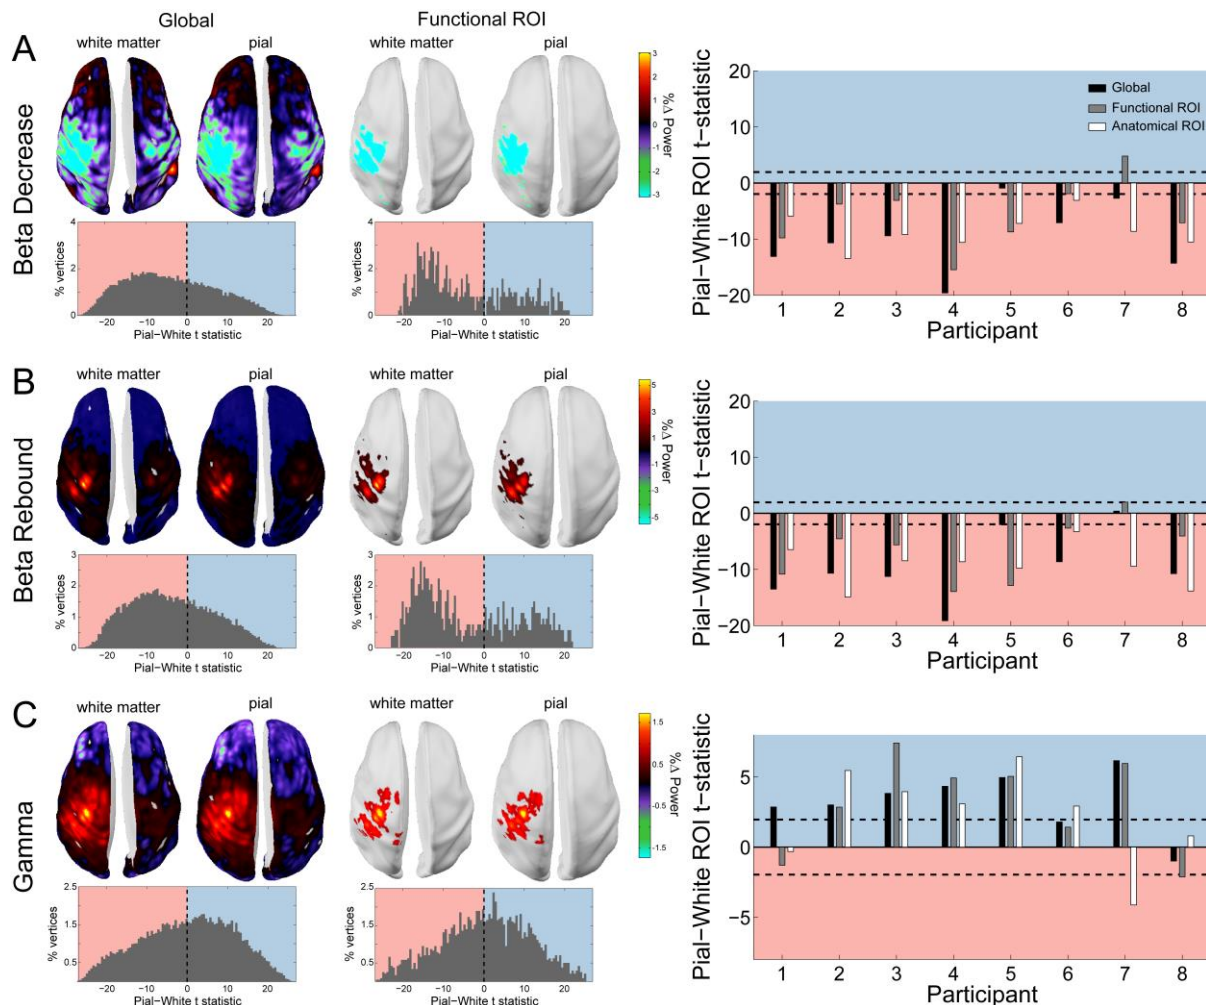

312 **Figure 5: Laminar specificity of sensorimotor beta and gamma.** As in figure 4, for A) the beta (15-30Hz) decrease prior to  
 313 the response, B) beta (15-30Hz) rebound following the response, and C) gamma (60-90Hz) power change from baseline  
 314 during the response. In the histograms and bar plots, positive and negative values indicate a bias towards the superficial  
 315 and deeper cortical layers, respectively. The dashed lines indicate single subject level significance thresholds. The black,  
 316 grey, and white bars indicate statistics based on regions of interest comprising the whole brain, functional and  
 317 anatomically-constrained ROIs, respectively.  
 318

319  
 320 Next we repeated our control analysis on the sensorimotor data, which mirrored those of visual  
 321 alpha and gamma. Sensor shuffling, as well as the addition of co-registration error, resulted in  
 322 sensorimotor beta and gamma localizing to the pial surface (**Figure S3, S4**), and the ROI t-statistics  
 323 increased in magnitude with the number of trials used in the analysis, with more trials required for  
 324 sensorimotor gamma signals to pass the significance threshold (**Figure S5**). Again, importantly, the  
 325 gamma superficial bias within the functionally defined and anatomically constrained ROIs did not  
 326 increase with SNR for the shuffled sensor data, meaning that the superficial localization of gamma  
 327 was not driven by low SNR (**Figure S5**).  
 328

### 329 **Superficial visual gamma scales with cue congruence**

330 Next, we asked whether the observed low and high-frequency laminar-specific activity in visual and  
 331 sensorimotor cortex dynamically varied with task demands in line with proposals about their role in  
 332 feedback and feedforward message passing (Adams et al., 2013; Arnal and Giraud, 2012; Bastos et  
 333 al., 2012; Donner and Siegel, 2011; Fries, 2005, 2015; Friston and Kiebel, 2009; Jensen and Mazaheri,  
 334 2010; Jensen et al., 2015; Stephan et al., 2017; Wang, 2010). This would provide additional indirect  
 335 support for the idea that communication in hierarchical cortical networks is organized through  
 336 distinct frequency channels along distinct anatomical pathways, to orchestrate top-down and  
 337 bottom-up control.

338 In our task, the direction of the instruction cue was congruent with the motion coherence direction  
339 in the RDK during most trials (70%). As such, if the direction of motion coherence is to the left, the  
340 instruction cue will most likely be a leftward arrow. Gamma activity increases in sensory areas during  
341 presentation of unexpected stimuli (Arnal et al., 2011; Gurtubay et al., 2001; Todorovic et al., 2011),  
342 and therefore we expected visual gamma activity in supragranular layers to be greater following  
343 incongruent instruction cues than after congruent cues. Indeed, the increase in visual gamma on the  
344 pial surface following the onset of the instruction cue was greater in incongruent compared to  
345 congruent trials ( $W(8)=0$ ,  $p=0.008$ ; 8/8 participants; incongruent-congruent  $M=1.64\%$ ,  $SD=2.34\%$ ;  
346 **Figure 6**).

347  
348

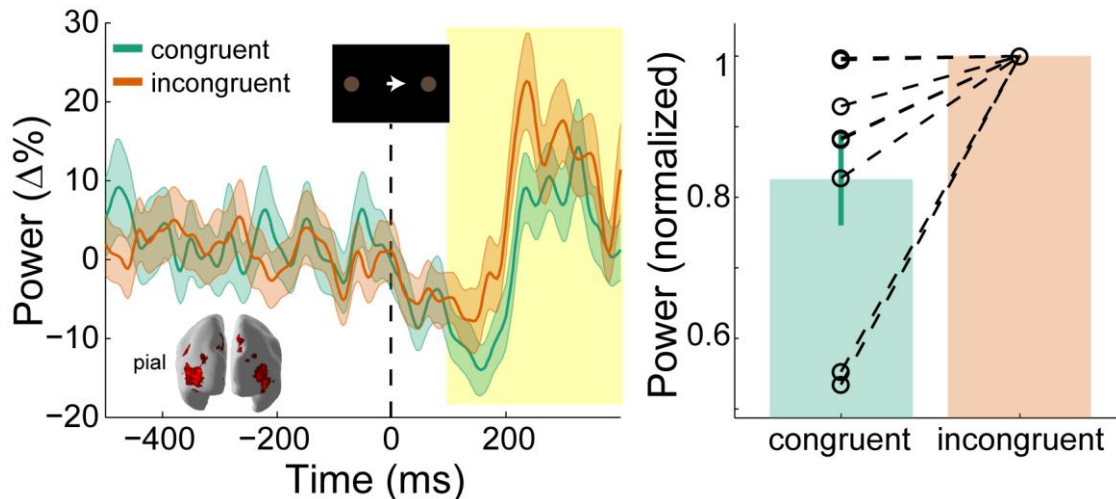

349 **Figure 6: Visual gamma activity modulation by task condition.** Visual gamma activity following the onset of the instruction  
350 stimulus within the functionally defined ROI of an example participant (left), and averaged within the time window  
351 represented by the shaded yellow rectangle for all participants (right). Each dashed line on the right shows the change in  
352 normalized values for the different conditions for each participant. The bar height represents the mean normalized change  
353 in gamma power, and the error bars denote the standard error. Visual gamma activity is stronger following the onset of the  
354 instruction cue when it is incongruent to the direction of the coherent motion in the random dot kinetogram (RDK).  
355

356  
357

### 358 **Deep sensorimotor beta scales with RDK motion coherence and cue congruence**

359 Changes in sensorimotor beta power during response preparation predict forthcoming motor  
360 responses (Donner et al., 2009; Haegens et al., 2011; de Lange et al., 2013), whereas the magnitude  
361 of sensorimotor beta rebound is attenuated by movement errors (Tan et al., 2014, 2016; Torrecillos  
362 et al., 2015). We therefore predicted that, in infragranular layers, the decrease in sensorimotor beta  
363 would scale with the motion coherence of the RDK, and the magnitude of the beta rebound would  
364 be decreased during incongruent trials when the prepared movement has to be changed in order to  
365 make a correct response.

366 The behavioral results presented thus far suggest that participants accumulated perceptual evidence  
367 from the RDK in order to prepare their response prior to the onset of the instruction cue. This  
368 preparation was accompanied by a reduction in beta power in the sensorimotor cortex contralateral  
369 to the hand used to indicate the response (**Figure 5A**). This beta decrease began from the onset of  
370 the RDK and was more pronounced with increasing coherence, demonstrating a significant effect of  
371 coherence on the white matter surface (**Figure 7A**;  $\chi^2(2)=9.75$ ,  $p=0.008$ ), with beta during high  
372 coherence trials significantly lower than during low coherence trials (8/8 participants;  $t(7)=-3.496$ ,  
373  $p=0.033$ ; low-high  $M=2.42\%$ ,  $SD=1.96\%$ ). Following the response, there was an increase in beta in  
374 contralateral sensorimotor cortex (beta rebound) which was greater in congruent, compared to  
375 incongruent trials on the white matter surface (**Figure 7B**;  $W(8)=34$ ,  $p=0.023$ ; 7/8 participants,

376 congruent-incongruent  $M=5.13\%$ ,  $SD=5.19\%$ ). In other words, the beta rebound was greatest when  
377 the cued response matched the prepared response.  
378

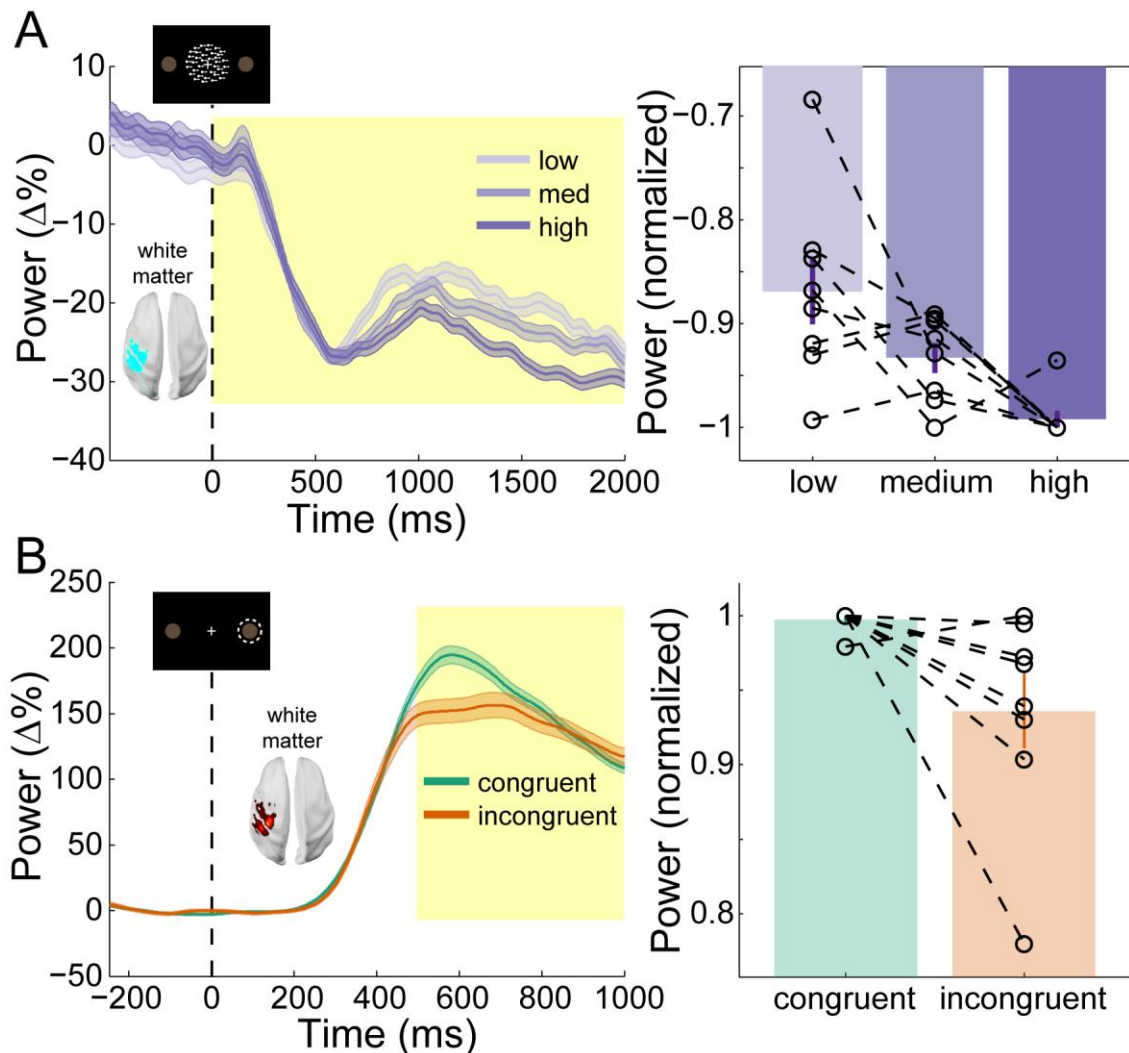

379 **Figure 7: Sensorimotor beta activity modulated by task condition.** A) Beta decrease following the onset of the random dot  
380 kinetogram (RDK) within the functionally defined ROI of an example participant over the duration of the RDK (left), and  
381 averaged over this duration for all participants (right). The bar height represents the mean normalized change in gamma  
382 power, and the error bars denote the standard error. The beta decrease becomes more pronounced with increasing  
383 coherence. B) As in A, for beta rebound following the response and averaged within the time window shown by the shaded  
384 yellow rectangle. Beta rebound is stronger following responses in congruent trials.  
385

386

### 387 Discussion

388 We have demonstrated that low and high frequency channels localize predominantly to deep and  
389 superficial laminae, respectively, in human visual and sensorimotor cortex. These channels play  
390 distinct roles in feedback and feedforward processing during visually guided action selection, with  
391 high frequency visual activity enhanced by a mismatch between feedforward and feedback signals,  
392 and low frequency sensorimotor activity modulated by a combination of feedforward and feedback  
393 influences during different task epochs. Through the use of novel MEG headcast technology (Meyer  
394 et al., 2017a; Troebinger et al., 2014a) and spatially and temporally resolved laminar analyses  
395 (Bonaiuto et al., 2017; Troebinger et al., 2014b), we provide novel evidence for the layer- and  
396 frequency-specific accounts of hierarchical cortical organization in humans.

397

398 **Low and high frequency channels localize to deep and superficial cortical laminae across visual and**  
399 **sensorimotor cortex**

400 We found that low frequency activity (alpha, 7-13Hz; and beta, 15-30Hz) predominately originated  
401 from deep cortical laminae, and high frequency activity (gamma, 60-90Hz) from superficial laminae  
402 in both visual and sensorimotor cortex. Our analysis included two built-in controls. Firstly, visually  
403 induced gamma after both the RDK and the instruction cue localized superficially, reinforcing the  
404 proposal that visual gamma generally predominates from superficial laminae. Secondly, both a  
405 decrease and increase in sensorimotor beta power localized to deep laminae, meaning that the  
406 laminar analysis was not simply biased toward deep sources for high power signals. Moreover, this  
407 laminar specificity was abolished by shuffling the sensors (**Figure S3**) or introducing co-registration  
408 error (**Figure S4**), underlining the need for spatially precise anatomical data and MEG recordings.  
409 Finally, the laminar bias of both low and high frequency signals increased monotonically as the  
410 number of trials included in the analysis increased, but not when the sensors were shuffled (**Figure**  
411 **S5**).

412 The localization of alpha activity to predominately deep laminae of visual cortex is in line with  
413 evidence from depth electrode recordings in visual areas of the non-human primate brain (Buffalo et  
414 al., 2011; van Kerkoerle et al., 2014; Maier et al., 2010; Smith et al., 2013; Spaak et al., 2012; Xing et  
415 al., 2012). Several studies who have found alpha generators in both infra- and supragranular layers  
416 in primary sensory areas (Bollimunta et al., 2008, 2011; Haegens et al., 2015), and it has been  
417 suggested that this discrepancy is due to a contamination of infragranular layer LFP signals by  
418 volume conduction from strong alpha generators in supragranular layers (Haegens et al., 2015;  
419 Halgren et al., 2017). This is unlikely to apply to the results presented here as this type of laminar  
420 MEG analysis is biased toward superficial laminae when SNR is low (**Figure S3, S4**; Bonaiuto et al.,  
421 2017). However, this analysis can only determine the laminar origin of the strongest activity when it  
422 occurs simultaneously at multiple depths (Bonaiuto et al., 2017), which is consistent with the fact  
423 that infragranular cortical layers contain the primary local pacemaking alpha generators (Bollimunta  
424 et al., 2008, 2011).

425 We found that gamma activity was strongest in superficial cortical laminae, which was expected  
426 given that gamma activity has been found to predominantly occur in supragranular layers in visual  
427 cortex (Buffalo et al., 2011; van Kerkoerle et al., 2014; Smith et al., 2013; Spaak et al., 2012; Xing et  
428 al., 2012), but see (Nandy et al., 2017). The mechanisms underlying the generation of gamma activity  
429 are diverse across the cortex (Buzsáki and Wang, 2012), but commonly involve reciprocal  
430 connections between pyramidal cells and interneurons, or between interneurons (Tiesinga and  
431 Sejnowski, 2009; Whittington et al., 2011). The local recurrent connections necessary for such  
432 reciprocal interactions are most numerous in supragranular layers (Buzsáki and Wang, 2012), as are  
433 fast-spiking interneurons which play a critical role in generating gamma activity (Cardin et al., 2009;  
434 Carlén et al., 2012; Sohal et al., 2009).

435 It is widely hypothesized that the laminar segregation of frequency specific channels is a common  
436 organizing principle across the cortical hierarchy (Arnal and Giraud, 2012; Bastos et al., 2012; Fries,  
437 2015; Wang, 2010). However, most evidence for this claim comes from depth electrode recordings  
438 in primary sensory areas, with the vast majority in visual cortical regions (Buffalo et al., 2011; van  
439 Kerkoerle et al., 2014; Smith et al., 2013; Spaak et al., 2012; Xing et al., 2012). While *in vivo* laminar  
440 data from primate sensorimotor cortex are lacking, *in vitro* recordings from somatosensory and  
441 motor cortices demonstrate that beta activity is generated in neural circuits dominated by  
442 infragranular layer V pyramidal cells (Roopun et al., 2006, 2010; Yamawaki et al., 2008). By contrast,  
443 gamma activity is thought to arise from supragranular layers II/III of mouse somatosensory cortex  
444 (Cardin et al., 2009; Carlén et al., 2012). The results presented here support generalized theories of  
445 laminar organization across cortex, and are the first to non-invasively provide evidence for the  
446 laminar origin of movement-related sensorimotor activity.

447  
448  
449  
450  
451  
452  
453  
454  
455  
456  
457  
458  
459  
460  
461  
462  
463  
464  
465  
466  
467  
468  
469  
470  
471  
472  
473  
474  
475  
476  
477  
478  
479  
480  
481  
482  
483  
484  
485  
486  
487  
488  
489  
490  
491  
492  
493  
494  
495  
496  
497

### **High frequency activity in visual cortex is enhanced by mismatches in feedforward and feedback signals**

We found that visual gamma was enhanced following the presentation of the instruction cue in incongruent compared to congruent trials. This was in agreement with our predictions, based on the fact that supragranular layer gamma activity is implicated in feedforward processing (van Kerkoerle et al., 2014). In our task, the direction of coherent motion in the RDK was congruent with the direction of the following instruction cue in most trials. Participants could therefore form a sensory expectation of the direction of the forthcoming instruction cue, which was violated in incongruent trials. The enhancement of visual gamma following incongruent cues is therefore consistent with the gamma activity increase observed in sensory areas during perceptual expectation violations (Arnal et al., 2011; Gurtubay et al., 2001; Todorovic et al., 2011) as well as layer-specific synaptic currents in supragranular cortical layers during performance error processing (Sajad et al., 2017).

### **Low frequency activity in sensorimotor cortex reflects a combination of feedforward and feedback processes**

There are numerous theories for the computational role of beta activity in motor systems. Decreases in beta power prior to the onset of a movement predict the selected action (Donner et al., 2009; Haegens et al., 2011; de Lange et al., 2013), whereas the beta rebound following a movement is attenuated by error monitoring processes (Tan et al., 2014, 2016; Torrecillos et al., 2015). Our results unify both of these accounts, showing that the level of beta decrease prior to a movement is modulated by the accumulation of sensory evidence predicting the cued movement, while the beta rebound is diminished when the prepared action must be suppressed in order to correctly perform the cued action. This suggests that in the sensorimotor system, low frequency activity can reflect both bottom-up and top-down processes depending on the task epoch. This may occur via bottom-up, feedforward projections from intraparietal regions to motor regions (Hanks et al., 2006; Kayser et al., 2010; Platt and Glimcher, 1999; Tosoni et al., 2008) or top-down, feedback projections from the dorsolateral prefrontal cortex (Curtis and Lee, 2010; Georgiev et al., 2016; Heekeren et al., 2006, 2004; Hussar and Pasternak, 2013). The dissociation between bottom-up and top-down influences during different task epochs could indicate that the decrease in beta and the following rebound are the result of functionally distinct processes.

### **Future directions**

Our ROI-based comparison of deep and superficial laminae can only determine the origin of the strongest source of activity, which does not imply that activity within a frequency band is exclusively confined to either deep or superficial sources within the same patch of cortex (Bollimunta et al., 2011; Haegens et al., 2015; Maier et al., 2010; Smith et al., 2013; Spaak et al., 2012; Xing et al., 2012). We should also note that in all of our control studies, in which we discard spatial information, a bias towards the superficial (pial) cortical surface was present. However, this bias does not increase with SNR for high frequency activity with poor anatomical models, mirroring the results of simulations showing that this type of laminar analysis is biased superficially at low SNR levels, but that the metrics are not statistically significant at these levels (Bonaiuto et al., 2017). Moreover, we used white matter and pial surface meshes to represent deep and superficial cortical laminae, respectively, and therefore our analysis is insensitive to granular sources. Recent studies have shown that beta, and perhaps gamma, activity is generated by stereotyped patterns of proximal and distal inputs to infragranular and supragranular pyramidal cells (Jones, 2016; Lee and Jones, 2013; Sherman et al., 2016). Future extensions to our laminar analysis could use a sliding time window in order to determine the time course of laminar activity. MEG is a global measure of neural activity, and therefore uniquely situated to test large scale computational models of laminar and frequency-specific interactions (Lee et al., 2013; Mejias et al., 2016; Pinotsis et al., 2017; Wang et al., 2013), as well as the possibility that other cortical areas are organized along different principles; for example,

498 in inferior temporal cortex the primary local pacemaking alpha generators are in supragranular  
499 layers (Bollimunta et al., 2008). Finally, in the task used here, participants were told that the  
500 direction of coherent motion in the RDK predicts the forthcoming instruction cue. Further research  
501 will determine how predictive cues are learned implicitly, and how this process shapes beta and  
502 gamma activity in visual and sensorimotor areas.

503

## 504 **Experimental Procedures**

### 505 **Behavioral Task**

506 Eight neurologically healthy volunteers participated in the experiment (6 male, aged  $28.5 \pm 8.52$   
507 years). The study protocol was in full accordance with the Declaration of Helsinki, and all participants  
508 gave written informed consent after being fully informed about the purpose of the study. The study  
509 protocol, participant information, and form of consent, were approved by the local ethics committee  
510 (reference number 5833/001). Participants completed a visually guided action decision making task  
511 in which they responded to visual stimuli projected on a screen by pressing one of two buttons on a  
512 button box using the index and middle finger of their right hand. On each trial, participants were  
513 required to fixate on a small white cross in the center of a screen. After a baseline period randomly  
514 varied between 1s and 2s, a random dot kinetogram (RDK) was displayed for 2s with coherent  
515 motion either to the left or to the right (**Figure 1A**). Following a 500ms delay, an instruction cue  
516 appeared, consisting of an arrow pointing either to the left or the right, and participants were  
517 instructed to press the corresponding button (left or right) as quickly and as accurately as possible.  
518 Trials ended once a response had been made or after a maximum of 1s if no response was made.

519 The task had a factorial design with congruence (whether or not the direction of the instruction cue  
520 matched that of the coherent motion in the RDK) and coherence (the percentage of coherently  
521 moving dots in the RDK) as factors (**Figure 1B**). Participants were instructed that in most of the trials  
522 (70%), the direction of coherent motion in the RDK was congruent to the direction of the instruction  
523 cue. Participants could therefore reduce their mean response time (RT) by preparing to press the  
524 button corresponding to the direction of the coherent motion. The RDK consisted of a  $10^\circ \times 10^\circ$   
525 square aperture centered on the fixation point with 100,  $0.3^\circ$  diameter dots, each moving at  $4^\circ/s$ .  
526 The levels were individually set for each participant by using an adaptive staircase procedure  
527 (QUEST; Watson and Pelli, 1983) to determine the motion coherence at which they achieved 82%  
528 accuracy in a block of 40 trials at the beginning of each session, in which they had to simply respond  
529 with the left or right button to leftwards or rightwards motion coherence. The resulting level of  
530 coherence was then used as medium, and 50% and 150% of it as low and high, respectively.

531 Each block contained 126 congruent trials, and 54 incongruent trials, and 60 trials for each  
532 coherence level with half containing coherent leftward motion, and half rightward (180 trials total).  
533 All trials were randomly ordered. Participants completed 3 blocks per session, and 1-5 sessions on  
534 different days, resulting in 540-2700 trials per participant ( $M=1822.5$ ,  $SD=813.21$ ). The behavioral  
535 task was implemented in MATLAB (The MathWorks, Inc., Natick, MA) using the Cogent 2000 toolbox  
536 (<http://www.vislab.ucl.ac.uk/cogent.php>).

537

### 538 **MRI Acquisition**

539 Prior to MEG sessions, participants underwent two of MRI scanning protocols during the same visit:  
540 one for the scan required to generate the scalp image for the headcast, and a second for MEG  
541 source localization. Structural MRI data were acquired using a 3T Magnetom TIM Trio MRI scanner  
542 (Siemens Healthcare, Erlangen, Germany). During the scan, the participant lay in the supine position  
543 with their head inside a 12-channel coil. Acquisition time was 3 min 42 s, plus a 45 s localizer  
544 sequence.

545 The first protocol was used to generate an accurate image of the scalp for headcast construction  
546 (Meyer et al., 2017a). This used a T1-weighted 3D spoiled fast low angle shot (FLASH) sequence with



547 the following acquisition parameters: 1mm isotropic image resolution, field-of view set to 256, 256,  
548 and 192 mm along the phase (anterior-posterior, A–P), read (head-foot, H–F), and partition (right-  
549 left, R–L) directions, respectively. The repetition time was 7.96ms and the excitation flip angle was  
550 12°. After each excitation, a single echo was acquired to yield a single anatomical image. A high  
551 readout bandwidth (425Hz/pixel) was used to preserve brain morphology and no significant  
552 geometric distortions were observed in the images. Acquisition time was 3 min 42s, a sufficiently  
553 short time to minimize sensitivity to head motion and any resultant distortion. Care was also taken  
554 to prevent distortions in the image due to skin displacement on the face, head, or neck, as any such  
555 errors could compromise the fit of the headcast. Accordingly, a more spacious 12 channel head coil  
556 was used for signal reception without using either padding or headphones.

557 The second protocol was a quantitative multiple parameter mapping (MPM) protocol, consisting of 3  
558 differentially-weighted, RF and gradient spoiled, multi-echo 3D FLASH acquisitions acquired with  
559 whole-brain coverage at 800 $\mu$ m isotropic resolution. Additional calibration data were also acquired  
560 as part of this protocol to correct for inhomogeneities in the RF transmit field (Callaghan et al., 2015;  
561 Lutti et al., 2010, 2012). For this protocol, data were acquired with a 32-channel head coil to  
562 increase SNR.

563 The FLASH acquisitions had predominantly proton density (PD), T1 or magnetization transfer (MT)  
564 weighting. The flip angle was 6° for the PD- and MT-weighted volumes and 21° for the T1 weighted  
565 acquisition. MT-weighting was achieved through the application of a Gaussian RF pulse 2 kHz off  
566 resonance with 4 ms duration and a nominal flip angle of 220° prior to each excitation. The field of  
567 view was set to 224, 256, and 179 mm along the phase (A–P), read (H–F), and partition (R–L)  
568 directions, respectively. Gradient echoes were acquired with alternating readout gradient polarity at  
569 eight equidistant echo times ranging from 2.34 to 18.44 ms in steps of 2.30 ms using a readout  
570 bandwidth of 488 Hz/pixel. Only six echoes were acquired for the MT-weighted acquisition in order  
571 to maintain a repetition time (TR) of 25 ms for all FLASH volumes. To accelerate the data acquisition  
572 and maintain a feasible scan time, partially parallel imaging using the GRAPPA algorithm (Griswold et  
573 al., 2002) was employed with a speed-up factor of 2 and forty integrated reference lines in each  
574 phase-encoded direction (A-P and R-L).

575 To maximize the accuracy of the measurements, inhomogeneity in the transmit field was mapped by  
576 acquiring spin echoes and stimulated echoes across a range of nominal flip angles following the  
577 approach described in Lutti et al. (2010), including correcting for geometric distortions of the EPI  
578 data due to B0 field inhomogeneity. Total acquisition time for all MRI scans was less than 30 min.

579 Quantitative maps of proton density (PD), longitudinal relaxation rate ( $R1 = 1/T1$ ), magnetization  
580 transfer saturation (MT) and effective transverse relaxation rate ( $R2^* = 1/T2^*$ ) were subsequently  
581 calculated according to the procedure described in Weiskopf et al. (2013). Each quantitative map  
582 was co-registered to the scan used to design the headcast, using the T1 weighted map. The resulting  
583 maps were used to extract cortical surface meshes using FreeSurfer (see below).

584

### 585 **Headcast Construction**

586 From an MRI-extracted image of the skull, a headcast that fit between the participant's scalp and the  
587 MEG dewar was constructed (Meyer et al., 2017a; Troebinger et al., 2014a). Scalp surfaces were first  
588 extracted from the T1-weighted MRI scans acquired in the first MRI protocol using standard SPM12  
589 procedures (<http://www.fil.ion.ucl.ac.uk/spm/>). Next, this tessellated surface was converted into the  
590 standard template library (STL) format, commonly used for 3D printing. Importantly, this conversion  
591 imposed only a rigid body transformation, meaning that it was easily reverse-transformable at any  
592 point in space back into native MRI space. Accordingly, when the fiducial locations were optimized  
593 and specified in STL space as coil-shaped protrusions on the scalp, their exact locations could be  
594 retrieved and employed for co-registration. Next, the headcast design was optimized by accounting

595 for factors such as headcast coverage in front of the ears, or angle of the bridge of the nose. To  
596 specify the shape of the fiducial coils, a single coil was 3D scanned and three virtual copies of it were  
597 placed at the approximate nasion, left peri-auricular (LPA), and right peri-auricular (RPA) sites, with  
598 the constraint that coil placements had to have the coil-body and wire flush against the scalp, in  
599 order to prevent movement of the coil when the headcast was worn. The virtual 3D model was  
600 placed inside a virtual version of the scanner dewar such that the distance to the sensors was  
601 minimized (by placing the head as far up within the dewar as possible) while ensuring that vision was  
602 not obstructed. Next, the head-model (plus spacing elements and coil protrusions) was printed using  
603 a Zcorp 3D printer (Zprinter 510) with 600 x 540 dots per inch resolution. The 3D printed head model  
604 was then placed inside the manufacturer-provided replica of the dewar and liquid resin was poured  
605 in between the surfaces to fill the negative space, resulting in the subject-specific headcast. The  
606 fiducial coil protrusions in the 3D model now become indentations in the resulting headcast, in  
607 which the fiducial coils can sit during scanning. The anatomical landmarks used for determining the  
608 spatial relationship between the brain and MEG sensors are thus in the same location for repeated  
609 scans, allowing data from multiple sessions to be combined (Meyer et al., 2017a).

610

### 611 **FreeSurfer Surface Extraction**

612 FreeSurfer (v5.3.0; Fischl, 2012) was used to extract cortical surfaces from the multi-parameter  
613 maps. Use of multi-parameter maps as input to FreeSurfer can lead to localized tissue segmentation  
614 failures due to boundaries between the pial surface, dura matter and CSF showing different contrast  
615 compared to that assumed within FreeSurfer algorithms (Lutti et al., 2014). Therefore, an in-house  
616 FreeSurfer surface reconstruction procedure was used to overcome these issues, using the PD and  
617 T1 maps as inputs. Detailed methods for cortical surface reconstruction can be found in Carey et al.  
618 (Carey et al., 2017). This process yields surface extractions for the pial surface (the most superficial  
619 layer of the cortex adjacent to the cerebro-spinal fluid, CSF), and the white/grey matter boundary  
620 (the deepest cortical layer). Each of these surfaces is downsampled by a factor of 10, resulting in two  
621 meshes comprising about 30,000 vertices each ( $M=30,094.75$ ,  $SD=2,665.45$  over participants). For  
622 the purpose of this paper, we will use these two surfaces to represent deep (white/grey interface)  
623 and superficial (grey-CSF interface) cortical models.

624

### 625 **MEG Acquisition**

626 MEG recordings were made using a 275-channel Canadian Thin Films (CTF) MEG system with  
627 superconducting quantum interference device (SQUID)-based axial gradiometers (VSM MedTech,  
628 Vancouver, Canada) in a magnetically shielded room. The data collected were digitized continuously  
629 at a sampling rate of 1200 Hz. A projector displayed the visual stimuli on a screen (~8m from the  
630 participant), and participants made responses with a button box.

631

### 632 **Behavioral Analyses**

633 Participant responses were classified as correct when the button pressed matched the direction of  
634 the instruction cue, and incorrect otherwise. The response time (RT) was measured as the time of  
635 button press relative to the onset of the instruction cue. Both measures were analyzed using  
636 repeated measures ANOVAs with congruence (congruent or incongruent) and coherence (low,  
637 medium, and high) as factors. Pairwise follow-up tests were performed between congruence levels  
638 at each coherence level, Bonferroni corrected.

639

### 640 **MEG Preprocessing**

641 All MEG data preprocessing and analyses were performed using SPM12  
642 (<http://www.fil.ion.ucl.ac.uk/spm/>) using Matlab R2014a and are available at  
643 <http://github.com/jbonaiuto/meg-laminar>. The data were filtered (5th order Butterworth bandpass  
644 filter: 2-100 Hz) and downsampled to 250 Hz. Eye-blink artifacts were removed using multiple source  
645 eye correction (Berg and Scherg, 1994). Trials were then epoched from 1s before RDK onset to 1.5s

646 after instruction cue onset, and from 2s before the participant's response to 2s after. Blocks within  
647 each session were merged, and trials whose variance exceeded 2.5 standard deviations from the  
648 mean were excluded from analysis.

649

### 650 **Source reconstruction**

651 Source inversion was performed using the empirical Bayesian beamformer (EBB; Belardinelli et al.,  
652 2012; López et al., 2014) within SPM. The sensor data were first reduced into 180 orthogonal spatial  
653 (lead field) modes and 16 temporal modes. The empirical Bayes optimization rests upon estimating  
654 hyper-parameters which express the relative contribution of source and sensor level covariance  
655 priors to the data (López et al., 2014). We assumed the sensor level covariance to be an identity  
656 matrix, with a single source level prior estimated from the data. The source level prior was based on  
657 the beamformer power estimate across a two-layer manifold comprised of pial and white cortical  
658 surfaces with source orientations defined as normal to the cortical surface. There were therefore  
659 only two hyper-parameters to estimate – defining the relative contribution of the source and sensor  
660 level covariance components to the data. We used the Nolte single shell head model as  
661 implemented in SPM (Nolte, 2003).

662

### 663 **Analyses for Laminar Discrimination**

664 The laminar analysis reconstructed the data onto a mesh combining the pial and white matter  
665 surfaces, thus providing an estimate of source activity on both surfaces (**Figure 3**). We analyzed six  
666 different visual and sensorimotor signals at different frequencies and time windows of interest  
667 (WOIs): RDK-aligned visual alpha (7-13Hz; WOI=[0s, 2s]; baseline WOI=[-1s, -.5s]), RDK-aligned visual  
668 gamma (60-90Hz; WOI=[250ms, 500ms]; baseline WOI=[-500ms, -250ms]), instruction cue-aligned  
669 visual gamma (60-90Hz; WOI=[100ms, 500ms]; baseline WOI=[-500ms, -100ms]), RDK-aligned  
670 sensorimotor beta (15-30Hz; WOI=[0s, 2s]; baseline WOI=[-500ms, 0ms]), response-aligned  
671 sensorimotor beta (15-30Hz; WOI=[500ms, 1s]; baseline WOI=[-250ms 250ms]), response-aligned  
672 sensorimotor gamma (60-90Hz; WOI=[-100ms, 200ms]; baseline WOI=[-1.5s, -1s]). For each signal,  
673 we defined an ROI by comparing power in the associated frequency band during the WOI with a  
674 prior baseline WOI at each vertex and averaging over trials. Vertices in either surface with a mean  
675 value in the 80<sup>th</sup> percentile over all vertices in that surface, as well as the corresponding vertices in  
676 the other surface, were included in the ROI. This ensured that the contrast used to define the ROI  
677 was orthogonal to the subsequent pial versus white matter surface contrast. For each trial, ROI  
678 values for the pial and white matter surfaces were computed by averaging the absolute value of the  
679 change in power compared to baseline in that surface within the ROI. Finally, a paired t-test was  
680 used to compare the ROI values from the pial surface with those from the white matter surface over  
681 trials (**Figure 3**). This resulted in positive t-statistics when the change in power was greatest on the  
682 pial surface, and negative values when the change was greatest on the white matter surface. All t-  
683 tests were performed with corrected noise variance estimates in order to attenuate artifactually  
684 high significance values (Ridgway et al., 2012).

685 The control analyses utilized the same procedure, but each introduced some perturbation to the  
686 data. The shuffled analysis permuted the lead fields of the forward model prior to source  
687 reconstruction in order to destroy any correspondence between the cortical surface geometry and  
688 the sensor data. This was repeated 10 times per session, with a different random lead field  
689 permutation each time. Each permutation was then used in the laminar analysis for every low and  
690 high frequency signal. The co-registration error analysis introduced a rotation ( $M=10^\circ$ ,  $SD=2.5^\circ$ ) and  
691 translation ( $M=10\text{mm}$ ,  $SD=2.5\text{mm}$ ) in a random direction of the fiducial coil locations prior to source  
692 inversion, simulating between-session co-registration error. This was done 10 times per session, with  
693 a different random rotation and translation each time. Again, each perturbation was used in the  
694 laminar analysis for every low and high frequency signal. The SNR analysis used a random subset of  
695 the available trials from each subject, gradually increasing the number of trials used from 10 to the

696 number of trials available. This was repeated 10 times, using a different random subset of trials each  
697 time, and the resulting t-statistics were averaged.

698

### 699 **Condition Comparison**

700 For each visual and sensorimotor frequency band/task epoch combination, induced activity was  
701 compared between task conditions on the surface and within the anatomically constrained ROI  
702 identified from the corresponding laminar analysis. Seven-cycle Morlet wavelets were used to  
703 compute power within the frequency band and this was baseline-corrected in a frequency-specific  
704 manner using robust averaging. For each participant, the mean percent change in power over the  
705 WOI was averaged over all trials within every condition. Wilcoxon tests for comparing two repeated  
706 measures were used to compare the change in power for instruction cue-aligned visual gamma and  
707 sensorimotor beta rebound between congruent and incongruent trials. A Friedman test for  
708 comparing multiple levels of a single factor with repeated measures was used to compare the  
709 sensorimotor beta decrease between low, medium, and high RDK coherence trials. This was  
710 followed up by Tukey-Kramer corrected pairwise comparisons. Only trials in which a correct  
711 response was made were analyzed.

712

### 713 **Acknowledgements**

714 JB is funded by a BBSRC research grant (BB/M009645/1). SM is supported by a Medical Research  
715 Council and Engineering and Physical Sciences Research Council grant MR/K6010/86010/1, the  
716 Medical Research Council UKMEG Partnership grant MR/K005464/1, and a Wellcome Principal  
717 Research Fellowship to Neil Burgess. SL is supported by a Wellcome Trust clinical postdoctoral grant  
718 (105804/Z/14/Z). The WCHN is supported by a strategic award from Wellcome (091593/Z/10/Z).

719

### 720 **References**

- 721 Adams, R.A., Shipp, S., and Friston, K.J. (2013). Predictions not commands: active inference in the  
722 motor system. *Brain Struct. Funct.* *218*, 611–643.
- 723 Arnal, L.H., and Giraud, A.-L. (2012). Cortical oscillations and sensory predictions. *Trends Cogn. Sci.*  
724 *16*, 390–398.
- 725 Arnal, L.H., Wyart, V., and Giraud, A.-L. (2011). Transitions in neural oscillations reflect prediction  
726 errors generated in audiovisual speech. *Nat. Neurosci.* *14*, 797–801.
- 727 Baillet, S. (2017). Magnetoencephalography for brain electrophysiology and imaging. *Nat. Neurosci.*  
728 *20*, 327–339.
- 729 Barbas, H., and Pandya, D.N. (1989). Architecture and intrinsic connections of the prefrontal cortex  
730 in the rhesus monkey. *J. Comp. Neurol.* *286*, 353–375.
- 731 Barone, P., Batardiere, A., Knoblauch, K., and Kennedy, H. (2000). Laminar distribution of neurons in  
732 extrastriate areas projecting to visual areas V1 and V4 correlates with the hierarchical rank and  
733 indicates the operation of a distance rule. *J. Neurosci.* *20*, 3263–3281.
- 734 Bastos, A.M., Usrey, W.M., Adams, R.A., Mangun, G.R., Fries, P., and Friston, K.J. (2012). Canonical  
735 microcircuits for predictive coding. *Neuron* *76*, 695–711.
- 736 Belardinelli, P., Ortiz, E., Barnes, G., Noppeney, U., and Preissl, H. (2012). Source reconstruction  
737 accuracy of MEG and EEG Bayesian inversion approaches. *PLoS One* *7*, e51985.
- 738 Berg, P., and Scherg, M. (1994). A multiple source approach to the correction of eye artifacts.  
739 *Electroencephalogr. Clin. Neurophysiol.* *90*, 229–241.
- 740 Bollimunta, A., Chen, Y., Schroeder, C.E., and Ding, M. (2008). Neuronal Mechanisms of Cortical  
741 Alpha Oscillations in Awake-Behaving Macaques. *J. Neurosci.* *28*.
- 742 Bollimunta, A., Mo, J., Schroeder, C.E., and Ding, M. (2011). Neuronal mechanisms and attentional  
743 modulation of corticothalamic  $\alpha$  oscillations. *J. Neurosci. Off. J. Soc. Neurosci.* *31*, 4935–4943.
- 744 Bonaiuto, J.J., Rossiter, H.E., Meyer, S.S., Adams, N., Little, S., Callaghan, M.F., Dick, F., Bestmann, S.,  
745 and Barnes, G.R. (2017). Non-invasive laminar inference with MEG: Comparison of methods and  
746 source inversion algorithms. *bioRxiv*.

- 747 Buffalo, E.A., Fries, P., Landman, R., Buschman, T.J., and Desimone, R. (2011). Laminar differences in  
748 gamma and alpha coherence in the ventral stream. *Proc. Natl. Acad. Sci. U. S. A.* *108*, 11262–11267.
- 749 Busch, N.A., Debener, S., Kranczioch, C., Engel, A.K., and Herrmann, C.S. (2004). Size matters: effects  
750 of stimulus size, duration and eccentricity on the visual gamma-band response. *Clin. Neurophysiol.*  
751 *115*, 1810–1820.
- 752 Buzsáki, G., and Wang, X.-J. (2012). Mechanisms of gamma oscillations. *Annu. Rev. Neurosci.* *35*,  
753 203–225.
- 754 Callaghan, M.F., Josephs, O., Herbst, M., Zaitsev, M., Todd, N., and Weiskopf, N. (2015). An  
755 evaluation of prospective motion correction (PMC) for high resolution quantitative MRI. *Front.*  
756 *Neurosci.* *9*, 97.
- 757 Cardin, J.A., Carlén, M., Meletis, K., Knoblich, U., Zhang, F., Deisseroth, K., Tsai, L.-H., and Moore, C.I.  
758 (2009). Driving fast-spiking cells induces gamma rhythm and controls sensory responses. *Nature* *459*,  
759 663–667.
- 760 Carey, D., Caprini, F., Allen, M., Lutti, A., Weiskopf, N., Rees, G., Callaghan, M.F., and Dick, F. (2017).  
761 Quantitative MRI Provides Markers Of Intra-, Inter-Regional, And Age-Related Differences In Young  
762 Adult Cortical Microstructure. *bioRxiv*.
- 763 Carlén, M., Meletis, K., Siegle, J.H., Cardin, J.A., Futai, K., Vierling-Claassen, D., Rühlmann, C., Jones,  
764 S.R., Deisseroth, K., Sheng, M., et al. (2012). A critical role for NMDA receptors in parvalbumin  
765 interneurons for gamma rhythm induction and behavior. *Mol. Psychiatry* *17*, 537–548.
- 766 Cassim, F., Monaca, C., Szurhaj, W., Bourriez, J.L., Defebvre, L., Derambure, P., and Guieu, J.D.  
767 (2001). Does post-movement beta synchronization reflect an idling motor cortex? *Neuroreport* *12*,  
768 3859–3863.
- 769 Cheyne, D., and Ferrari, P. (2013). MEG studies of motor cortex gamma oscillations: evidence for a  
770 gamma “fingerprint” in the brain? *Front. Hum. Neurosci.* *7*, 575.
- 771 Cheyne, D., Bells, S., Ferrari, P., Gaetz, W., and Bostan, A.C. (2008). Self-paced movements induce  
772 high-frequency gamma oscillations in primary motor cortex. *Neuroimage* *42*, 332–342.
- 773 Cohen, M.X. (2017). Where Does EEG Come From and What Does It Mean? *Trends Neurosci.* *40*,  
774 208–218.
- 775 Crone, N., Miglioretti, D.L., Gordon, B., and Lesser, R.P. (1998). Functional mapping of human  
776 sensorimotor cortex with electrocorticographic spectral analysis. II. Event-related synchronization in  
777 the gamma band. *Brain* *121*, 2301–2315.
- 778 Curtis, C.E., and Lee, D. (2010). Beyond working memory: the role of persistent activity in decision  
779 making. *Trends Cogn. Sci.* *14*, 216–222.
- 780 Donner, T.H., and Siegel, M. (2011). A framework for local cortical oscillation patterns. *Trends Cogn.*  
781 *Sci.* *15*, 191–199.
- 782 Donner, T.H., Siegel, M., Fries, P., and Engel, A.K. (2009). Buildup of choice-predictive activity in  
783 human motor cortex during perceptual decision making. *Curr. Biol.* *19*, 1581–1585.
- 784 Engel, A.K., and Fries, P. (2010). Beta-band oscillations--signalling the status quo? *Curr. Opin.*  
785 *Neurobiol.* *20*, 156–165.
- 786 Felleman, D.J., and Van Essen, D.C. (1991). Distributed hierarchical processing in the primate  
787 cerebral cortex. *Cereb Cortex* *1*, 1–47.
- 788 Fischl, B. (2012). FreeSurfer. *Neuroimage* *62*, 774–781.
- 789 Fischl, B., and Dale, A.M. (2000). Measuring the thickness of the human cerebral cortex from  
790 magnetic resonance images. *Proc. Natl. Acad. Sci. U. S. A.* *97*, 11050–11055.
- 791 Fontolan, L., Morillon, B., Liegeois-Chauvel, C., and Giraud, A.-L. (2014). The contribution of  
792 frequency-specific activity to hierarchical information processing in the human auditory cortex. *Nat.*  
793 *Commun.* *5*, 4694.
- 794 Fries, P. (2005). A mechanism for cognitive dynamics: neuronal communication through neuronal  
795 coherence. *Trends Cogn. Sci.* *9*, 474–480.
- 796 Fries, P. (2015). Rhythms for Cognition: Communication through Coherence. *Neuron* *88*, 220–235.

- 797 Fries, P., Reynolds, J., Rorie, A.E., and Desimone, R. (2001). Modulation of Oscillatory Neuronal  
798 Synchronization by Selective Visual Attention. *Science* (80-. ). *291*, 1560–1563.
- 799 Friston, K., and Kiebel, S. (2009). Predictive coding under the free-energy principle. *Philos. Trans. R.*  
800 *Soc. Lond. B. Biol. Sci.* *364*, 1211–1221.
- 801 Gaetz, W., Edgar, J.C., Wang, D.J., and Roberts, T.P.L. (2011). Relating MEG measured motor cortical  
802 oscillations to resting  $\gamma$ -Aminobutyric acid (GABA) concentration. *Neuroimage* *55*, 616–621.
- 803 Georgiev, D., Rocchi, L., Tocco, P., Speekenbrink, M., Rothwell, J.C., and Jahanshahi, M. (2016).  
804 Continuous Theta Burst Stimulation Over the Dorsolateral Prefrontal Cortex and the Pre-SMA Alter  
805 Drift Rate and Response Thresholds Respectively During Perceptual Decision-Making. *Brain Stimul.* *9*,  
806 601–608.
- 807 Griswold, M.A., Jakob, P.M., Heidemann, R.M., Nittka, M., Jellus, V., Wang, J., Kiefer, B., and Haase,  
808 A. (2002). Generalized autocalibrating partially parallel acquisitions (GRAPPA). *Magn. Reson. Med.*  
809 *47*, 1202–1210.
- 810 Gurtubay, I.G., Alegre, M., Labarga, A., Malanda, A., Iriarte, J., and Artieda, J. (2001). Gamma band  
811 activity in an auditory oddball paradigm studied with the wavelet transform. *Clin. Neurophysiol.* *112*,  
812 1219–1228.
- 813 Haegens, S., Nácher, V., Hernández, A., Luna, R., Jensen, O., and Romo, R. (2011). Beta oscillations in  
814 the monkey sensorimotor network reflect somatosensory decision making. *Proc. Natl. Acad. Sci. U.*  
815 *S. A.* *108*, 10708–10713.
- 816 Haegens, S., Barczak, A., Musacchia, G., Lipton, M.L., Mehta, A.D., Lakatos, P., and Schroeder, C.E.  
817 (2015). Laminar Profile and Physiology of the Rhythm in Primary Visual, Auditory, and  
818 Somatosensory Regions of Neocortex. *J. Neurosci.* *35*, 14341–14352.
- 819 Halgren, M., Devinsky, O., Doyle, W.K., Bastuji, H., Rey, M., Mak-McCully, R., Chauvel, P., Ulbert, I.,  
820 Fabo, D., Wittner, L., et al. (2017). The Generation and Propagation of the Human Alpha Rhythm.  
821 bioRxiv 202564.
- 822 Hämäläinen, M., Hari, R., Ilmoniemi, R.J., Knuutila, J., and Lounasmaa, O. V. (1993).  
823 Magnetoencephalography theory, instrumentation, and applications to noninvasive studies of the  
824 working human brain. *Rev. Mod. Phys.* *65*, 413–497.
- 825 Hanks, T.D., Ditterich, J., and Shadlen, M.N. (2006). Microstimulation of macaque area LIP affects  
826 decision-making in a motion discrimination task. *Nat. Neurosci.* *9*, 682–689.
- 827 Hari, R., and Salmelin, R. (1997). Human cortical oscillations: A neuromagnetic view through the  
828 skull. *Trends Neurosci.* *20*, 44–49.
- 829 Heekeren, H., Marrett, S., Ruff, D.A., Bandettini, P., and Ungerleider, L.G. (2006). Involvement of  
830 human left dorsolateral prefrontal cortex in perceptual decision making is independent of response  
831 modality. *Proc. Natl. Acad. Sci. U. S. A.* *103*, 10023–10028.
- 832 Heekeren, H.R., Marrett, S., Bandettini, P.A., and Ungerleider, L.G. (2004). A general mechanism for  
833 perceptual decision-making in the human brain. *Nature* *431*, 859–862.
- 834 Hilgetag, C.C., and Barbas, H. (2006). Role of Mechanical Factors in the Morphology of the Primate  
835 Cerebral Cortex. *PLoS Comput. Biol.* *2*, e22.
- 836 Hillebrand, A., and Barnes, G.R. (2002). A quantitative assessment of the sensitivity of whole-head  
837 MEG to activity in the adult human cortex. *Neuroimage* *16*, 638–650.
- 838 Hillebrand, A., and Barnes, G.R. (2003). The use of anatomical constraints with MEG beamformers.  
839 *Neuroimage* *20*, 2302–2313.
- 840 Hillebrand, A., and Barnes, G.R. (2011). Practical constraints on estimation of source extent with  
841 MEG beamformers. *Neuroimage* *54*, 2732–2740.
- 842 Hoogenboom, N., Schoffelen, J.-M., Oostenveld, R., Parkes, L.M., and Fries, P. (2006). Localizing  
843 human visual gamma-band activity in frequency, time and space. *Neuroimage* *29*, 764–773.
- 844 Huo, X., Xiang, J., Wang, Y., Kirtman, E.G., Kotecha, R., Fujiwara, H., Hemasilpin, N., Rose, D.F., and  
845 Degrauw, T. (2010). Gamma oscillations in the primary motor cortex studied with MEG. *Brain Dev.*  
846 *32*, 619–624.

- 847 Hussar, C.R., and Pasternak, T. (2013). Common rules guide comparisons of speed and direction of  
848 motion in the dorsolateral prefrontal cortex. *J. Neurosci.* *33*, 972–986.
- 849 Jensen, O., and Mazaheri, A. (2010). Shaping Functional Architecture by Oscillatory Alpha Activity:  
850 Gating by Inhibition. *Front. Hum. Neurosci.* *4*, 186.
- 851 Jensen, O., Bonnefond, M., Marshall, T.R., and Tiesinga, P. (2015). Oscillatory mechanisms of  
852 feedforward and feedback visual processing. *Trends Neurosci.* *38*, 192–194.
- 853 Jones, S.R. (2016). When brain rhythms aren't "rhythmic": implication for their mechanisms and  
854 meaning. *Curr. Opin. Neurobiol.* *40*, 72–80.
- 855 Jones, S.E., Buchbinder, B.R., and Aharon, I. (2000). Three-dimensional mapping of cortical thickness  
856 using Laplace's equation. *Hum. Brain Mapp.* *11*, 12–32.
- 857 Jurkiewicz, M.T., Gaetz, W.C., Bostan, A.C., and Cheyne, D. (2006). Post-movement beta rebound is  
858 generated in motor cortex: Evidence from neuromagnetic recordings. *Neuroimage* *32*, 1281–1289.
- 859 Kabani, N., Le Goualher, G., MacDonald, D., and Evans, A.C. (2001). Measurement of Cortical  
860 Thickness Using an Automated 3-D Algorithm: A Validation Study. *Neuroimage* *13*, 375–380.
- 861 Kayser, A.S., Buchsbaum, B.R., Erickson, D.T., and D'Esposito, M. (2010). The Functional Anatomy of  
862 a Perceptual Decision in the Human Brain. *J. Neurophysiol.* *103*, 1179–1194.
- 863 Van Kerkoerle, T., Self, M.W., Dagnino, B., Gariel-Mathis, M.-A., Poort, J., van der Togt, C., and  
864 Roelfsema, P.R. (2014). Alpha and gamma oscillations characterize feedback and feedforward  
865 processing in monkey visual cortex. *Proc. Natl. Acad. Sci. U. S. A.* *111*, 14332–14341.
- 866 Kok, P., Bains, L.J., van Mourik, T., Norris, D.G., and de Lange, F.P. (2016). Selective Activation of the  
867 Deep Layers of the Human Primary Visual Cortex by Top-Down Feedback. *Curr. Biol.* *26*, 371–376.
- 868 Koopmans, P.J., Barth, M., and Norris, D.G. (2010). Layer-specific BOLD activation in human V1. *Hum.*  
869 *Brain Mapp.* *31*, 1297–1304.
- 870 De Lange, F.P., Rahnev, D.A., Donner, T.H., and Lau, H. (2013). Prestimulus oscillatory activity over  
871 motor cortex reflects perceptual expectations. *J. Neurosci.* *33*, 1400–1410.
- 872 Larson, E., Maddox, R.K., and Lee, A.K.C. (2014). Improving spatial localization in MEG inverse  
873 imaging by leveraging intersubject anatomical differences. *Front. Neurosci.* *8*, 330.
- 874 Lee, S., and Jones, S.R. (2013). Distinguishing mechanisms of gamma frequency oscillations in human  
875 current source signals using a computational model of a laminar neocortical network. *Front. Hum.*  
876 *Neurosci.* *7*, 869.
- 877 Lee, J.H., Whittington, M.A., Kopell, N.J., Deuchars, J., and Silberberg, G. (2013). Top-Down Beta  
878 Rhythms Support Selective Attention via Interlaminar Interaction: A Model. *PLoS Comput. Biol.* *9*,  
879 e1003164.
- 880 Lerch, J.P., and Evans, A.C. (2005). Cortical thickness analysis examined through power analysis and a  
881 population simulation. *Neuroimage* *24*, 163–173.
- 882 López, J.D., Litvak, V., Espinosa, J.J., Friston, K., and Barnes, G.R. (2014). Algorithmic procedures for  
883 Bayesian MEG/EEG source reconstruction in SPM. *Neuroimage* *84*, 476–487.
- 884 Lutti, A., Hutton, C., Finsterbusch, J., Helms, G., and Weiskopf, N. (2010). Optimization and validation  
885 of methods for mapping of the radiofrequency transmit field at 3T. *Magn. Reson. Med.* *64*, 229–238.
- 886 Lutti, A., Stadler, J., Josephs, O., Windischberger, C., Speck, O., Bernarding, J., Hutton, C., and  
887 Weiskopf, N. (2012). Robust and fast whole brain mapping of the RF transmit field B1 at 7T. *PLoS*  
888 *One* *7*, e32379.
- 889 Lutti, A., Dick, F., Sereno, M.I., and Weiskopf, N. (2014). Using high-resolution quantitative mapping  
890 of R1 as an index of cortical myelination. *Neuroimage* *93*, 176–188.
- 891 MacDonald, D., Kabani, N., Avis, D., and Evans, A.C. (2000). Automated 3-D Extraction of Inner and  
892 Outer Surfaces of Cerebral Cortex from MRI. *Neuroimage* *12*, 340–356.
- 893 Maier, A., Adams, G.K., Aura, C., and Leopold, D.A. (2010). Distinct Superficial and deep laminar  
894 domains of activity in the visual cortex during rest and stimulation. *Front. Syst. Neurosci.* *4*.
- 895 Markov, N.T., Ercsey-Ravasz, M., Van Essen, D.C., Knoblauch, K., Toroczkai, Z., and Kennedy, H.  
896 (2013). Cortical high-density counterstream architectures. *Science* *342*, 1238406.

- 897 Markov, N.T., Ercsey-Ravasz, M.M., Ribeiro Gomes, A.R., Lamy, C., Magrou, L., Vezoli, J., Misery, P.,  
898 Falchier, A., Quilodran, R., Gariel, M.A., et al. (2014a). A Weighted and Directed Interareal  
899 Connectivity Matrix for Macaque Cerebral Cortex. *Cereb. Cortex* 24, 17–36.
- 900 Markov, N.T., Vezoli, J., Chameau, P., Falchier, A., Quilodran, R., Huissoud, C., Lamy, C., Misery, P.,  
901 Giroud, P., Ullman, S., et al. (2014b). Anatomy of hierarchy: Feedforward and feedback pathways in  
902 macaque visual cortex. *J. Comp. Neurol.* 522, 225–259.
- 903 Matelli, M., Luppino, G., and Rizzolatti, G. (1991). Architecture of superior and mesial area 6 and the  
904 adjacent cingulate cortex in the macaque monkey. *J Comp Neurol* 311, 445–462.
- 905 Mazaheri, A., van Schouwenburg, M.R., Dimitrijevic, A., Denys, D., Cools, R., and Jensen, O. (2014).  
906 Region-specific modulations in oscillatory alpha activity serve to facilitate processing in the visual  
907 and auditory modalities. *Neuroimage* 87, 356–362.
- 908 Medvedovsky, M., Taulu, S., Bikmullina, R., and Paetau, R. (2007). Artifact and head movement  
909 compensation in MEG. *Neurol. Neurophysiol. Neurosci.* 4.
- 910 Mehrkanoon, S., Breakspear, M., and Boonstra, T.W. (2014). The reorganization of corticomuscular  
911 coherence during a transition between sensorimotor states. *Neuroimage* 100, 692–702.
- 912 Mejias, J.F., Murray, J.D., Kennedy, H., and Wang, X.-J. (2016). Feedforward and feedback frequency-  
913 dependent interactions in a large-scale laminar network of the primate cortex. *Sci Adv* 2, e1601335.
- 914 Meyer, S.S., Bonaiuto, J., Lim, M., Rossiter, H., Waters, S., Bradbury, D., Bestmann, S., Brookes, M.,  
915 Callaghan, M.F., Weiskopf, N., et al. (2017a). Flexible head-casts for high spatial precision MEG. *J.*  
916 *Neurosci. Methods* 276, 38–45.
- 917 Meyer, S.S., Rossiter, H., Brookes, M.J., Woolrich, M.W., Bestmann, S., and Barnes, G.R. (2017b).  
918 Using generative models to make probabilistic statements about hippocampal engagement in MEG.  
919 *Neuroimage* 149, 468–482.
- 920 Michalareas, G., Vezoli, J., van Pelt, S., Schoffelen, J.-M., Kennedy, H., and Fries, P. (2016). Alpha-  
921 Beta and Gamma Rhythms Subserve Feedback and Feedforward Influences among Human Visual  
922 Cortical Areas. *Neuron* 89, 384–397.
- 923 Müller, M.M., Bosch, J., Elbert, T., Kreiter, A., Sosa, M. V, Sosa, P. V, and Rockstroh, B. (1996).  
924 Visually induced gamma-band responses in human electroencephalographic activity--a link to animal  
925 studies. *Exp. Brain Res.* 112, 96–102.
- 926 Muthukumaraswamy, S.D. (2010). Functional Properties of Human Primary Motor Cortex Gamma  
927 Oscillations. *J. Neurophysiol.* 104, 2873–2885.
- 928 Muthukumaraswamy, S.D., and Singh, K.D. (2013). Visual gamma oscillations: The effects of stimulus  
929 type, visual field coverage and stimulus motion on MEG and EEG recordings. *Neuroimage* 69, 223–  
930 230.
- 931 Nandy, A.S., Nassi, J.J., and Reynolds, J.H. (2017). Laminar Organization of Attentional Modulation in  
932 Macaque Visual Area V4. *Neuron* 93, 235–246.
- 933 Nolte, G. (2003). The magnetic lead field theorem in the quasi-static approximation and its use for  
934 magnetoencephalography forward calculation in realistic volume conductors. *Phys. Med. Biol.* 48,  
935 3637–3652.
- 936 Olman, C.A., Harel, N., Feinberg, D.A., He, S., Zhang, P., Ugurbil, K., and Yacoub, E. (2012). Layer-  
937 Specific fMRI Reflects Different Neuronal Computations at Different Depths in Human V1. *PLoS One*  
938 7, e32536.
- 939 Parkes, L.M., Bastiaansen, M.C.M., and Norris, D.G. (2006). Combining EEG and fMRI to investigate  
940 the post-movement beta rebound. *Neuroimage* 29, 685–696.
- 941 Pfurtscheller, G., and Neuper, C. (1997). Motor imagery activates primary sensorimotor area in  
942 humans. *Neurosci. Lett.* 239, 65–68.
- 943 Pfurtscheller, G., Stancák, A., and Neuper, C. (1996). Post-movement beta synchronization. A  
944 correlate of an idling motor area? *Electroencephalogr. Clin. Neurophysiol.* 98, 281–293.
- 945 Pinotsis, D.A., Geerts, J.P., Pinto, L., FitzGerald, T.H.B., Litvak, V., Auksztulewicz, R., and Friston, K.J.  
946 (2017). Linking canonical microcircuits and neuronal activity: Dynamic causal modelling of laminar  
947 recordings. *Neuroimage* 146, 355–366.



- 948 Platt, M.L., and Glimcher, P.W. (1999). Neural correlates of decision variables in parietal cortex.  
949 *Nature* 400, 233–238.
- 950 Rajkowska, G., and Goldman-Rakic, P.S. (1995). Cytoarchitectonic Definition of Prefrontal Areas in  
951 the Normal Human Cortex: I. Remapping of Areas 9 and 46 using Quantitative Criteria. *Cereb. Cortex*  
952 5, 307–322.
- 953 Roopun, A.K., Middleton, S.J., Cunningham, M.O., LeBeau, F.E.N., Bibbig, A., Whittington, M.A., and  
954 Traub, R.D. (2006). A beta2-frequency (20-30 Hz) oscillation in nonsynaptic networks of  
955 somatosensory cortex. *Proc. Natl. Acad. Sci. U. S. A.* 103, 15646–15650.
- 956 Roopun, A.K., Lebeau, F.E.N., Rammell, J., Cunningham, M.O., Traub, R.D., and Whittington, M.A.  
957 (2010). Cholinergic neuromodulation controls directed temporal communication in neocortex in  
958 vitro. *Front. Neural Circuits* 4, 8.
- 959 Sajad, A., Godlove, D.C., and Schall, J.D. (2017). Microcircuitry of Performance Monitoring. *bioRxiv*.
- 960 Salmelin, R., Hämäläinen, M., Kajola, M., and Hari, R. (1995). Functional segregation of movement-  
961 related rhythmic activity in the human brain. *Neuroimage* 2, 237–243.
- 962 Sauseng, P., Klimesch, W., Stadler, W., Schabus, M., Doppelmayr, M., Hanslmayr, S., Gruber, W.R.,  
963 and Birbaumer, N. (2005). A shift of visual spatial attention is selectively associated with human EEG  
964 alpha activity. *Eur. J. Neurosci.* 22, 2917–2926.
- 965 Scheeringa, R., and Fries, P. (2017). Cortical layers, rhythms and BOLD signals. *Neuroimage*.
- 966 Sherman, M.A., Lee, S., Law, R., Haegens, S., Thorn, C.A., Hämäläinen, M.S., Moore, C.I., and Jones,  
967 S.R. (2016). Neural mechanisms of transient neocortical beta rhythms: Converging evidence from  
968 humans, computational modeling, monkeys, and mice. *Proc. Natl. Acad. Sci. U. S. A.* 113, E4885–  
969 E4894.
- 970 Smith, M.A., Jia, X., Zandvakili, A., and Kohn, A. (2013). Laminar dependence of neuronal correlations  
971 in visual cortex. *J. Neurophysiol.* 109, 940–947.
- 972 Sohal, V.S., Zhang, F., Yizhar, O., and Deisseroth, K. (2009). Parvalbumin neurons and gamma  
973 rhythms enhance cortical circuit performance. *Nature* 459, 698–702.
- 974 Sotero, R.C., Bortel, A., Naaman, S., Mocanu, V.M., Kropf, P., Villeneuve, M.Y., and Shmuel, A. (2015).  
975 Laminar Distribution of Phase-Amplitude Coupling of Spontaneous Current Sources and Sinks. *Front.*  
976 *Neurosci.* 9, 454.
- 977 Spaak, E., Bonnefond, M., Maier, A., Leopold, D.A., and Jensen, O. (2012). Layer-specific entrainment  
978 of  $\gamma$ -band neural activity by the  $\alpha$  rhythm in monkey visual cortex. *Curr. Biol. CB* 22, 2313–2318.
- 979 Stephan, K.E., Petzschner, F.H., Kasper, L., Bayer, J., Wellstein, K.V., Stefanics, G., Pruessmann, K.P.,  
980 and Heinzle, J. (2017). Laminar fMRI and computational theories of brain function. *Neuroimage*.
- 981 Sun, W., and Dan, Y. (2009). Layer-specific network oscillation and spatiotemporal receptive field in  
982 the visual cortex. *Proc. Natl. Acad. Sci. U. S. A.* 106, 17986–17991.
- 983 Tan, H., Jenkinson, N., and Brown, P. (2014). Dynamic Neural Correlates of Motor Error Monitoring  
984 and Adaptation during Trial-to-Trial Learning. *J. Neurosci.* 34, 5678–5688.
- 985 Tan, H., Wade, C., and Brown, P. (2016). Post-Movement Beta Activity in Sensorimotor Cortex  
986 Indexes Confidence in the Estimations from Internal Models. *J. Neurosci.* 36, 1516–1528.
- 987 Thut, G. (2006).  $\beta$ -Band Electroencephalographic Activity over Occipital Cortex Indexes Visuospatial  
988 Attention Bias and Predicts Visual Target Detection. *J. Neurosci.* 26, 9494–9502.
- 989 Tiesinga, P., and Sejnowski, T.J. (2009). Cortical Enlightenment: Are Attentional Gamma Oscillations  
990 Driven by ING or PING? *Neuron* 63, 727–732.
- 991 Todorovic, A., van Ede, F., Maris, E., and de Lange, F.P. (2011). Prior Expectation Mediates Neural  
992 Adaptation to Repeated Sounds in the Auditory Cortex: An MEG Study. *J. Neurosci.* 31, 9118–9123.
- 993 Torrecillos, F., Alayrangues, J., Kilavik, B.E., and Malfait, N. (2015). Distinct Modulations in  
994 Sensorimotor Postmovement and Foreperiod  $\beta$ -Band Activities Related to Error Salience Processing  
995 and Sensorimotor Adaptation. *J. Neurosci.* 35, 12753–12765.
- 996 Tosoni, A., Galati, G., Romani, G.L., and Corbetta, M. (2008). Sensory-motor mechanisms in human  
997 parietal cortex underlie arbitrary visual decisions. *Nat. Neurosci.* 11, 1446–1453.

- 998 Troebinger, L., López, J.D., Lutti, A., Bradbury, D., Bestmann, S., and Barnes, G. (2014a). High  
999 precision anatomy for MEG. *Neuroimage* *86*, 583–591.
- 1000 Troebinger, L., López, J.D., Lutti, A., Bestmann, S., and Barnes, G. (2014b). Discrimination of cortical  
1001 laminae using MEG. *Neuroimage* *102*, 885–893.
- 1002 Uutela, K., Taulu, S., and Hämäläinen, M. (2001). Detecting and Correcting for Head Movements in  
1003 Neuromagnetic Measurements. *Neuroimage* *14*, 1424–1431.
- 1004 Wang, X.-J. (2010). Neurophysiological and computational principles of cortical rhythms in cognition.  
1005 *Physiol. Rev.* *90*, 1195–1268.
- 1006 Wang, P., Knösche, T.R., Raij, T., Bonmassar, G., and Devore, S. (2013). A Realistic Neural Mass Model  
1007 of the Cortex with Laminar-Specific Connections and Synaptic Plasticity – Evaluation with Auditory  
1008 Habituation. *PLoS One* *8*, e77876.
- 1009 Watson, A.B., and Pelli, D.G. (1983). Quest: A Bayesian adaptive psychometric method. *Percept.*  
1010 *Psychophys.* *33*, 113–120.
- 1011 Weiskopf, N., Suckling, J., Williams, G., Correia, M.M., Inkster, B., Tait, R., Ooi, C., Bullmore, E.T., and  
1012 Lutti, A. (2013). Quantitative multi-parameter mapping of R1, PD(\*), MT, and R2(\*) at 3T: a multi-  
1013 center validation. *Front. Neurosci.* *7*, 95.
- 1014 Whittington, M.A., Cunningham, M.O., LeBeau, F.E.N., Racca, C., and Traub, R.D. (2011). Multiple  
1015 origins of the cortical gamma rhythm. *Dev. Neurobiol.* *71*, 92–106.
- 1016 Xing, D., Yeh, C.-I., Burns, S., and Shapley, R.M. (2012). Laminar analysis of visually evoked activity in  
1017 the primary visual cortex. *Proc. Natl. Acad. Sci. U. S. A.* *109*, 13871–13876.
- 1018 Yamagishi, N., Goda, N., Callan, D.E., Anderson, S.J., and Kawato, M. (2005). Attentional shifts  
1019 towards an expected visual target alter the level of alpha-band oscillatory activity in the human  
1020 calcarine cortex. *Cogn. Brain Res.* *25*, 799–809.
- 1021 Yamawaki, N., Stanford, I.M., Hall, S.D., and Woodhall, G.L. (2008). Pharmacologically induced and  
1022 stimulus evoked rhythmic neuronal oscillatory activity in the primary motor cortex in vitro.  
1023 *Neuroscience* *151*, 386–395.
- 1024
